# Supplementary material for: Host-Parasite Interaction of Atlantic salmon (Salmo salar) and the Ectoparasite Neoparamoeba perurans in Amoebic Gill Disease
Source: Front Immunol. 2021 May 31;12:672700. doi: 10.3389/fimmu.2021.672700 (PMC8202022; doi:10.3389/fimmu.2021.672700)
Supplement: Supplementary Table 1 — Illumina sequencing statistics. Data yield, number of obtained raw paired-end reads, number of mapped fragments for each RNA-Seq library [Excel table]. [file Table_1.xlsx]

## Sheet: Sheet1
Supplementary Table 1. Illumina sequencing statistics. Data yield, number of obtained raw paired-end reads, number of mapped fragments for each RNA-Seq library.
RNA-Seq library	Tissue	Animal Condition	Library Description	Data Yield (Gb)	Paired-end reads (M)	Mapped Reads (M)
C_GILL_F1	Gill	Naïve	Gill biological replicate 1	25.61	84.79	74.38
C_GILL_F2			Gill biological replicate 2	25.18	83.39	71.16
C_GILL_F3			Gill biological replicate 3	26.41	87.46	75.35
C_GILL_F4			Gill biological replicate 4	25.6	84.78	71.62
INF_D_GILL_F5		AGD-affected	Gill biopsy distal to the lesion biological replicate 1	22.55	74.66	65.04
INF_D_GILL_F6			Gill biopsy distal to the lesion biological replicate 2	26.86	88.96	78.39
INF_D_GILL_F7			Gill biopsy distal to the lesion biological replicate 3	22.26	73.7	64.72
INF_D_GILL_F8			Gill biopsy distal to the lesion biological replicate 4	24.99	82.76	70.82
INF_LES_F5			Gill biopsy at the lesion biological replicate 1	125.47	415.45	359.34
INF_LES_F6			Gill biopsy at the lesion biological replicate 2	92.65	306.78	263.85
INF_LES_F7*			Gill biopsy at the lesion biological replicate 3	N/A	N/A	N/A
INF_LES_F8			Gill biopsy at the lesion biological replicate 4	109.94	364.05	317.92
C_HK_F1	Head kidney	Naïve	Head kidney biological replicate 1	24.94	82.58	71.9
C_HK_F2			Head kidney biological replicate 2	22.01	72.89	65.1
C_HK_F3			Head kidney biological replicate 3	19.38	64.17	57.15
C_HK_F4			Head kidney biological replicate 4	23.63	78.26	69.67
INF_HK_F5		AGD-affected	Head kidney biological replicate 1	25.4	84.12	75.2
INF_HK_F6			Head kidney biological replicate 2	25.16	83.31	72.09
INF_HK_F7			Head kidney biological replicate 3	25.54	84.56	73.8
INF_HK_F8			Head kidney biological replicate 4	25.88	85.7	71.57
C_SP_F1	Spleen	Naïve	Spleen biological replicate 1	27.13	89.82	80.46
C_SP_F2			Spleen biological replicate 2	23.37	77.38	69.23
C_SP_F3			Spleen biological replicate 3	26.4	87.43	76.49
C_SP_F4			Spleen biological replicate 4	13.11	43.4	39.17
INF_SP_F5		AGD-affected	Spleen biological replicate 1	28.84	95.51	84.24
INF_SP_F6			Spleen biological replicate 2	25.06	83	73.81
INF_SP_F7			Spleen biological replicate 3	23.16	76.67	66.69
INF_SP_F8			Spleen biological replicate 4	26.56	87.95	77.42
FL_CELLS_1	Neopar-amoeba perurans	Floating trophozoite	Cultured N. perurans floating trophozoites biological replicate 1	11.32	37.49	N/A
FL_CELLS_2			Cultured N. perurans floating trophozoites biological replicate 2	10.51	34.79	N/A
FL_CELLS_3			Cultured N. perurans floating trophozoites biological replicate 3	10.37	34.34	N/A
Total				945.3	3130.14
* INF_LES_F7 RNA failed quality control post-extractiono and was removed from the study
