# Supplementary material for: Host-Parasite Interaction of Atlantic salmon (Salmo salar) and the Ectoparasite Neoparamoeba perurans in Amoebic Gill Disease
Source: Front Immunol. 2021 May 31;12:672700. doi: 10.3389/fimmu.2021.672700 (PMC8202022; doi:10.3389/fimmu.2021.672700)
Supplement: Supplementary Table 6 — Enriched gene ontology (fold change > 2; P < 0.05) for the systemic response to amoebic gill disease in the head kidney of Atlantic salmon affected by AGD in contrast to naïve fish. [Excel table]. [file Table_6.xlsx]

## Sheet: Sheet1
Supplementary Table 6. Enriched gene ontology (fold change > 2; P < 0.05) for the systemic response to amoebic gill disease in the head kidney of Atlantic salmon affected by AGD in contrast to naïve fish.
Tissue/Condition	Regulation	Ontology	Gene Ontology ID	Description	GeneRatio	BgRatio	P-value	P-adjusted	Q-value	GeneID	Gene description
Head kidney	UP	Biological process	GO:0007275	multicellular organism development (progression over time)	46/416	438/10002	4.95955e-09	4.20569e-06	3.73271e-06	106588366	ectonucleotide pyrophosphatase/phosphodiesterase family member 2-like
										106578536	frizzled-8-like
										106607949	POU domain, class 3, transcription factor 2-like
										100194490	homeobox protein HoxB6ab
										106609305	protein Wnt-16-like
										106580877	frizzled-9-like
										106568818	noelin-like
										106572609	hepatocyte nuclear factor 4-alpha-like
										106584146	BMP/retinoic acid-inducible neural-specific protein 3-like
										106573239	neuron navigator 2-like
										106599664	laminin subunit alpha-3-like
										100136586	HNF1 homeobox A
										106590346	laminin subunit alpha-1-like
										100194435	homeobox protein HoxC8aa
										106569804	xin actin-binding repeat-containing protein 1-like
										106569340	Wnt family member 9A
										106574614	POU domain, class 3, transcription factor 3-B
										100196638	homeobox protein HoxC6ba
										100195881	Homeobox protein Hox-B7a
										106585777	olfactomedin 1
										106567096	hepatocyte nuclear factor 4-alpha-like
										106579386	uncharacterized LOC106579386
										106563295	paired box protein Pax-8-like
										106586775	POU class 3 homeobox 3
										106565906	draxin-A
										106566842	paired box protein Pax-8-like
										106570415	protein NDRG1-like
										106561060	transcription factor SOX-6-like
										106607481	uncharacterized LOC106607481
										106579100	mucin-13-like
										106581182	hepatocyte nuclear factor 1-beta-A-like
										106604525	platelet derived growth factor C
										106576171	protein Wnt-16-like
										100194434	homeobox protein HoxC9aa
										106574165	calmodulin-regulated spectrin-associated protein 2-like
										106612790	hepatocyte nuclear factor 1-beta-A-like
										100194484	homeobox protein HoxB8aa
										106585459	stromelysin-3-like
										106588846	homeobox protein Hox-A9-like
										100194614	c20orf149 protein
										106579920	filamin-interacting protein FAM101A-like
										100194471	homeobox protein HoxA7aa
										106600835	homeobox protein Hox-B9a-like
										100194489	homeobox protein HoxB8ab
										100194442	homeobox protein HoxC8an
										100194477	homeobox protein HoxA7ab
Head kidney	UP	Biological process	GO:0048856	anatomical structure development (maturation)	48/416	497/10002	3.35503e-08	1.42253e-05	1.26255e-05	106588366	ectonucleotide pyrophosphatase/phosphodiesterase family member 2-like
										106578536	frizzled-8-like
										106607949	POU domain, class 3, transcription factor 2-like
										100194490	homeobox protein HoxB6ab
										106609305	protein Wnt-16-like
										106580877	frizzled-9-like
										106568818	noelin-like
										106572609	hepatocyte nuclear factor 4-alpha-like
										106584146	BMP/retinoic acid-inducible neural-specific protein 3-like
										106573239	neuron navigator 2-like
										106599664	laminin subunit alpha-3-like
										100136586	HNF1 homeobox A
										106590346	laminin subunit alpha-1-like
										100194435	homeobox protein HoxC8aa
										106569804	xin actin-binding repeat-containing protein 1-like
										106569340	Wnt family member 9A
										106574614	POU domain, class 3, transcription factor 3-B
										100196638	homeobox protein HoxC6ba
										100195881	Homeobox protein Hox-B7a
										106585777	olfactomedin 1
										106567096	hepatocyte nuclear factor 4-alpha-like
										106579386	uncharacterized LOC106579386
										106563295	paired box protein Pax-8-like
										106586775	POU class 3 homeobox 3
										106565906	draxin-A
										106566842	paired box protein Pax-8-like
										106570415	protein NDRG1-like
										106561060	transcription factor SOX-6-like
										106583498	ETS-related transcription factor Elf-3-like
										106607481	uncharacterized LOC106607481
										106579100	mucin-13-like
										106581182	hepatocyte nuclear factor 1-beta-A-like
										106604525	platelet derived growth factor C
										106576171	protein Wnt-16-like
										100194434	homeobox protein HoxC9aa
										106574165	calmodulin-regulated spectrin-associated protein 2-like
										106612790	hepatocyte nuclear factor 1-beta-A-like
										100194484	homeobox protein HoxB8aa
										106585459	stromelysin-3-like
										106588846	homeobox protein Hox-A9-like
										100194614	c20orf149 protein
										106565106	ETS-related transcription factor Elf-3-like
										106579920	filamin-interacting protein FAM101A-like
										100194471	homeobox protein HoxA7aa
										106600835	homeobox protein Hox-B9a-like
										100194489	homeobox protein HoxB8ab
										100194442	homeobox protein HoxC8an
										100194477	homeobox protein HoxA7ab
Head kidney	UP	Biological process	GO:0017144	drug metabolic process	30/416	248/10002	1.2768e-07	3.6091e-05	3.20321e-05	106608869	ornithine aminotransferase, mitochondrial-like
										106612556	succinate dehydrogenase [ubiquinone] cytochrome b small subunit B, mitochondrial-like
										106586273	pyridoxal kinase-like
										106561658	probable 2-oxoglutarate dehydrogenase E1 component DHKTD1, mitochondrial
										100195168	Adenylosuccinate synthetase isozyme 1
										106596660	acetyl-coenzyme A synthetase, cytoplasmic-like
										106580927	succinate dehydrogenase [ubiquinone] cytochrome b small subunit B, mitochondrial-like
										106584046	N(G),N(G)-dimethylarginine dimethylaminohydrolase 1-like
										106602876	ATP synthase subunit g, mitochondrial-like
										106566120	serine hydroxymethyltransferase 2
										106613069	S-adenosylmethionine synthase isoform type-1-like
										100194621	adenylosuccinate synthase like 2
										100196494	guanidinoacetate N-methyltransferase
										106580756	cytochrome P450 2M1
										106578409	thiamin pyrophosphokinase 1
										106611602	alcohol dehydrogenase class-3-like
										106606505	enolase family member 4
										106561681	histidine ammonia-lyase
										106573878	guanidinoacetate N-methyltransferase
										106571621	allantoicase
										106576798	kynurenine 3-monooxygenase-like
										106576224	histidine ammonia-lyase-like
										106590033	ATP synthase F(0) complex subunit C3, mitochondrial-like
										106590602	homogentisate 1,2-dioxygenase
										106612435	putative hexokinase HKDC1
										100136522	aldolase b, fructose-bisphosphate
										106562090	glycine cleavage system H protein, mitochondrial-like
										106589688	adenylosuccinate synthetase isozyme 2-like
										106586175	catalase-like
										106564824	catalase-like
Head kidney	UP	Biological process	GO:0009914	hormone transport	7/416	14/10002	5.45495e-07	7.70966e-05	6.84261e-05	106565332	family with sequence similarity 3 member D
										106572609	hepatocyte nuclear factor 4-alpha-like
										100136586	HNF1 homeobox A
										100380590	Islet cell autoantigen 1
										106567096	hepatocyte nuclear factor 4-alpha-like
										106581182	hepatocyte nuclear factor 1-beta-A-like
										106612790	hepatocyte nuclear factor 1-beta-A-like
Head kidney	UP	Biological process	GO:0030072	peptide hormone secretion	7/416	14/10002	5.45495e-07	7.70966e-05	6.84261e-05	106565332	family with sequence similarity 3 member D
										106572609	hepatocyte nuclear factor 4-alpha-like
										100136586	HNF1 homeobox A
										100380590	Islet cell autoantigen 1
										106567096	hepatocyte nuclear factor 4-alpha-like
										106581182	hepatocyte nuclear factor 1-beta-A-like
										106612790	hepatocyte nuclear factor 1-beta-A-like
Head kidney	UP	Biological process	GO:0046879	hormone secretion	7/416	14/10002	5.45495e-07	7.70966e-05	6.84261e-05	106565332	family with sequence similarity 3 member D
										106572609	hepatocyte nuclear factor 4-alpha-like
										100136586	HNF1 homeobox A
										100380590	Islet cell autoantigen 1
										106567096	hepatocyte nuclear factor 4-alpha-like
										106581182	hepatocyte nuclear factor 1-beta-A-like
										106612790	hepatocyte nuclear factor 1-beta-A-like
Head kidney	UP	Biological process	GO:0006520	cellular amino acid metabolic process	25/416	206/10002	1.37727e-06	0.00013033	0.000115673	106582961	delta-1-pyrroline-5-carboxylate dehydrogenase, mitochondrial-like
										106608869	ornithine aminotransferase, mitochondrial-like
										106578328	proline dehydrogenase 2
										106564456	4-aminobutyrate aminotransferase, mitochondrial-like
										100194932	aminoacylase 1
										106584046	N(G),N(G)-dimethylarginine dimethylaminohydrolase 1-like
										106583705	glutaminase kidney isoform, mitochondrial-like
										106605473	succinate-semialdehyde dehydrogenase, mitochondrial-like
										106573756	aspartate aminotransferase, mitochondrial-like
										106566120	serine hydroxymethyltransferase 2
										100196494	guanidinoacetate N-methyltransferase
										100196287	Arginase-1
										106593072	glutathione S-transferase zeta 1
										106561681	histidine ammonia-lyase
										106573878	guanidinoacetate N-methyltransferase
										106576798	kynurenine 3-monooxygenase-like
										106576224	histidine ammonia-lyase-like
										106560480	tryptophanyl-tRNA synthetase
										106590602	homogentisate 1,2-dioxygenase
										100195397	4-hydroxyphenylpyruvate dioxygenase
										106576140	branched-chain-amino-acid aminotransferase, cytosolic-like
										106609451	amidohydrolase domain containing 1
										106562090	glycine cleavage system H protein, mitochondrial-like
										106601062	L-serine dehydratase/L-threonine deaminase-like
										106580394	L-serine dehydratase/L-threonine deaminase-like
Head kidney	UP	Biological process	GO:0019752	carboxylic acid metabolic process	38/416	401/10002	1.59086e-06	0.00013033	0.000115673	106582961	delta-1-pyrroline-5-carboxylate dehydrogenase, mitochondrial-like
										106608869	ornithine aminotransferase, mitochondrial-like
										106612556	succinate dehydrogenase [ubiquinone] cytochrome b small subunit B, mitochondrial-like
										106578328	proline dehydrogenase 2
										106561658	probable 2-oxoglutarate dehydrogenase E1 component DHKTD1, mitochondrial
										100329172	delta-6 fatty acyl desaturase-like
										106596660	acetyl-coenzyme A synthetase, cytoplasmic-like
										106564456	4-aminobutyrate aminotransferase, mitochondrial-like
										100194932	aminoacylase 1
										106580927	succinate dehydrogenase [ubiquinone] cytochrome b small subunit B, mitochondrial-like
										106584046	N(G),N(G)-dimethylarginine dimethylaminohydrolase 1-like
										106583705	glutaminase kidney isoform, mitochondrial-like
										106611776	malate synthase-like
										106605473	succinate-semialdehyde dehydrogenase, mitochondrial-like
										106573756	aspartate aminotransferase, mitochondrial-like
										106566120	serine hydroxymethyltransferase 2
										100195275	enoyl-CoA hydratase and 3-hydroxyacyl CoA dehydrogenase
										100196494	guanidinoacetate N-methyltransferase
										106580756	cytochrome P450 2M1
										100196287	Arginase-1
										106569008	cholesterol 7-alpha-monooxygenase-like
										106593072	glutathione S-transferase zeta 1
										106574012	elongation of very long chain fatty acids protein 4-like
										106606505	enolase family member 4
										106561681	histidine ammonia-lyase
										106573878	guanidinoacetate N-methyltransferase
										106576798	kynurenine 3-monooxygenase-like
										106576224	histidine ammonia-lyase-like
										106560480	tryptophanyl-tRNA synthetase
										106590602	homogentisate 1,2-dioxygenase
										106612435	putative hexokinase HKDC1
										100136522	aldolase b, fructose-bisphosphate
										100195397	4-hydroxyphenylpyruvate dioxygenase
										106576140	branched-chain-amino-acid aminotransferase, cytosolic-like
										106609451	amidohydrolase domain containing 1
										106562090	glycine cleavage system H protein, mitochondrial-like
										106601062	L-serine dehydratase/L-threonine deaminase-like
										106580394	L-serine dehydratase/L-threonine deaminase-like
Head kidney	UP	Biological process	GO:0010817	regulation of hormone levels	9/416	29/10002	1.62941e-06	0.00013033	0.000115673	106565332	family with sequence similarity 3 member D
										106572609	hepatocyte nuclear factor 4-alpha-like
										100136586	HNF1 homeobox A
										100380590	Islet cell autoantigen 1
										106567096	hepatocyte nuclear factor 4-alpha-like
										106610934	glutamyl aminopeptidase-like
										106581182	hepatocyte nuclear factor 1-beta-A-like
										106612419	endothelin-converting enzyme 2-like
										106612790	hepatocyte nuclear factor 1-beta-A-like
Head kidney	UP	Biological process	GO:0006082	organic acid metabolic process	38/416	402/10002	1.6906e-06	0.00013033	0.000115673	106582961	delta-1-pyrroline-5-carboxylate dehydrogenase, mitochondrial-like
										106608869	ornithine aminotransferase, mitochondrial-like
										106612556	succinate dehydrogenase [ubiquinone] cytochrome b small subunit B, mitochondrial-like
										106578328	proline dehydrogenase 2
										106561658	probable 2-oxoglutarate dehydrogenase E1 component DHKTD1, mitochondrial
										100329172	delta-6 fatty acyl desaturase-like
										106596660	acetyl-coenzyme A synthetase, cytoplasmic-like
										106564456	4-aminobutyrate aminotransferase, mitochondrial-like
										100194932	aminoacylase 1
										106580927	succinate dehydrogenase [ubiquinone] cytochrome b small subunit B, mitochondrial-like
										106584046	N(G),N(G)-dimethylarginine dimethylaminohydrolase 1-like
										106583705	glutaminase kidney isoform, mitochondrial-like
										106611776	malate synthase-like
										106605473	succinate-semialdehyde dehydrogenase, mitochondrial-like
										106573756	aspartate aminotransferase, mitochondrial-like
										106566120	serine hydroxymethyltransferase 2
										100195275	enoyl-CoA hydratase and 3-hydroxyacyl CoA dehydrogenase
										100196494	guanidinoacetate N-methyltransferase
										106580756	cytochrome P450 2M1
										100196287	Arginase-1
										106569008	cholesterol 7-alpha-monooxygenase-like
										106593072	glutathione S-transferase zeta 1
										106574012	elongation of very long chain fatty acids protein 4-like
										106606505	enolase family member 4
										106561681	histidine ammonia-lyase
										106573878	guanidinoacetate N-methyltransferase
										106576798	kynurenine 3-monooxygenase-like
										106576224	histidine ammonia-lyase-like
										106560480	tryptophanyl-tRNA synthetase
										106590602	homogentisate 1,2-dioxygenase
										106612435	putative hexokinase HKDC1
										100136522	aldolase b, fructose-bisphosphate
										100195397	4-hydroxyphenylpyruvate dioxygenase
										106576140	branched-chain-amino-acid aminotransferase, cytosolic-like
										106609451	amidohydrolase domain containing 1
										106562090	glycine cleavage system H protein, mitochondrial-like
										106601062	L-serine dehydratase/L-threonine deaminase-like
										106580394	L-serine dehydratase/L-threonine deaminase-like
Head kidney	UP	Biological process	GO:0043436	oxoacid metabolic process	38/416	402/10002	1.6906e-06	0.00013033	0.000115673	106582961	delta-1-pyrroline-5-carboxylate dehydrogenase, mitochondrial-like
										106608869	ornithine aminotransferase, mitochondrial-like
										106612556	succinate dehydrogenase [ubiquinone] cytochrome b small subunit B, mitochondrial-like
										106578328	proline dehydrogenase 2
										106561658	probable 2-oxoglutarate dehydrogenase E1 component DHKTD1, mitochondrial
										100329172	delta-6 fatty acyl desaturase-like
										106596660	acetyl-coenzyme A synthetase, cytoplasmic-like
										106564456	4-aminobutyrate aminotransferase, mitochondrial-like
										100194932	aminoacylase 1
										106580927	succinate dehydrogenase [ubiquinone] cytochrome b small subunit B, mitochondrial-like
										106584046	N(G),N(G)-dimethylarginine dimethylaminohydrolase 1-like
										106583705	glutaminase kidney isoform, mitochondrial-like
										106611776	malate synthase-like
										106605473	succinate-semialdehyde dehydrogenase, mitochondrial-like
										106573756	aspartate aminotransferase, mitochondrial-like
										106566120	serine hydroxymethyltransferase 2
										100195275	enoyl-CoA hydratase and 3-hydroxyacyl CoA dehydrogenase
										100196494	guanidinoacetate N-methyltransferase
										106580756	cytochrome P450 2M1
										100196287	Arginase-1
										106569008	cholesterol 7-alpha-monooxygenase-like
										106593072	glutathione S-transferase zeta 1
										106574012	elongation of very long chain fatty acids protein 4-like
										106606505	enolase family member 4
										106561681	histidine ammonia-lyase
										106573878	guanidinoacetate N-methyltransferase
										106576798	kynurenine 3-monooxygenase-like
										106576224	histidine ammonia-lyase-like
										106560480	tryptophanyl-tRNA synthetase
										106590602	homogentisate 1,2-dioxygenase
										106612435	putative hexokinase HKDC1
										100136522	aldolase b, fructose-bisphosphate
										100195397	4-hydroxyphenylpyruvate dioxygenase
										106576140	branched-chain-amino-acid aminotransferase, cytosolic-like
										106609451	amidohydrolase domain containing 1
										106562090	glycine cleavage system H protein, mitochondrial-like
										106601062	L-serine dehydratase/L-threonine deaminase-like
										106580394	L-serine dehydratase/L-threonine deaminase-like
Head kidney	UP	Biological process	GO:0006811	ion transport	32/416	317/10002	2.90087e-06	0.000204995	0.00018194	106589821	mitochondrial pyruvate carrier 1-like
										106575789	mitochondrial pyruvate carrier 2-like
										106613163	inward rectifier potassium channel 13-like
										106568452	trimeric intracellular cation channel type B-like
										100196793	solute carrier family 6 member 19
										106600764	ferritin, middle subunit-like
										106575754	sodium/potassium-transporting ATPase subunit beta-233-like
										106602876	ATP synthase subunit g, mitochondrial-like
										100846967	Sodium/potassium-transporting ATPase subunit beta-1
										106572485	solute carrier family 13 member 3-like
										106602061	inward rectifier potassium channel 16-like
										106606396	inward rectifier potassium channel 16-like
										106600767	ferritin, middle subunit-like
										100195195	Sodium-dependent phosphate transporter 1-A
										106567194	solute carrier family 13 member 3
										106600766	ferritin, middle subunit
										100195531	chloride intracellular channel 2
										106572122	solute carrier organic anion transporter family member 4A1-like
										106563184	V-type proton ATPase 116 kDa subunit a isoform 2-like
										106567683	ATP-sensitive inward rectifier potassium channel 15-like
										106567903	solute carrier organic anion transporter family member 2B1-like
										106576934	voltage-dependent calcium channel gamma-6 subunit-like
										106590033	ATP synthase F(0) complex subunit C3, mitochondrial-like
										100136391	sodium/potassium-transporting ATPase subunit beta-233
										106562485	solute carrier family 12 member 1-like
										106584211	barttin CLCNK type accessory beta subunit
										106607810	scavenger receptor class A member 5-like
										106603573	solute carrier family 13 member 5
										106603448	ATP-sensitive inward rectifier potassium channel 15-like
										106607311	cytolysin RTX-A-like
										106612730	sodium/potassium-transporting ATPase subunit gamma-like
										106600951	ferritin, middle subunit
Head kidney	UP	Biological process	GO:0009063	cellular amino acid catabolic process	10/416	40/10002	3.83975e-06	0.00025047	0.000222301	106582961	delta-1-pyrroline-5-carboxylate dehydrogenase, mitochondrial-like
										106578328	proline dehydrogenase 2
										106584046	N(G),N(G)-dimethylarginine dimethylaminohydrolase 1-like
										106605473	succinate-semialdehyde dehydrogenase, mitochondrial-like
										106561681	histidine ammonia-lyase
										106576798	kynurenine 3-monooxygenase-like
										106576224	histidine ammonia-lyase-like
										106590602	homogentisate 1,2-dioxygenase
										106609451	amidohydrolase domain containing 1
										106562090	glycine cleavage system H protein, mitochondrial-like
Head kidney	UP	Biological process	GO:0030073	insulin secretion	6/416	13/10002	6.68193e-06	0.0004008	0.000355725	106572609	hepatocyte nuclear factor 4-alpha-like
										100136586	HNF1 homeobox A
										100380590	Islet cell autoantigen 1
										106567096	hepatocyte nuclear factor 4-alpha-like
										106581182	hepatocyte nuclear factor 1-beta-A-like
										106612790	hepatocyte nuclear factor 1-beta-A-like
Head kidney	UP	Biological process	GO:1901606	alpha-amino acid catabolic process	9/416	34/10002	7.08962e-06	0.0004008	0.000355725	106582961	delta-1-pyrroline-5-carboxylate dehydrogenase, mitochondrial-like
										106578328	proline dehydrogenase 2
										106584046	N(G),N(G)-dimethylarginine dimethylaminohydrolase 1-like
										106561681	histidine ammonia-lyase
										106576798	kynurenine 3-monooxygenase-like
										106576224	histidine ammonia-lyase-like
										106590602	homogentisate 1,2-dioxygenase
										106609451	amidohydrolase domain containing 1
										106562090	glycine cleavage system H protein, mitochondrial-like
Head kidney	UP	Biological process	GO:0009072	aromatic amino acid family metabolic process	7/416	20/10002	9.91111e-06	0.000525289	0.000466214	106593072	glutathione S-transferase zeta 1
										106561681	histidine ammonia-lyase
										106576798	kynurenine 3-monooxygenase-like
										106576224	histidine ammonia-lyase-like
										106590602	homogentisate 1,2-dioxygenase
										100195397	4-hydroxyphenylpyruvate dioxygenase
										106609451	amidohydrolase domain containing 1
Head kidney	UP	Biological process	GO:1901605	alpha-amino acid metabolic process	15/416	99/10002	1.30885e-05	0.000652885	0.00057946	106582961	delta-1-pyrroline-5-carboxylate dehydrogenase, mitochondrial-like
										106608869	ornithine aminotransferase, mitochondrial-like
										106578328	proline dehydrogenase 2
										106584046	N(G),N(G)-dimethylarginine dimethylaminohydrolase 1-like
										106583705	glutaminase kidney isoform, mitochondrial-like
										106566120	serine hydroxymethyltransferase 2
										100196494	guanidinoacetate N-methyltransferase
										100196287	Arginase-1
										106561681	histidine ammonia-lyase
										106573878	guanidinoacetate N-methyltransferase
										106576798	kynurenine 3-monooxygenase-like
										106576224	histidine ammonia-lyase-like
										106590602	homogentisate 1,2-dioxygenase
										106609451	amidohydrolase domain containing 1
										106562090	glycine cleavage system H protein, mitochondrial-like
Head kidney	UP	Biological process	GO:0023061	signal release	8/416	31/10002	2.83998e-05	0.00133795	0.00118748	106565332	family with sequence similarity 3 member D
										106572609	hepatocyte nuclear factor 4-alpha-like
										100136586	HNF1 homeobox A
										100380590	Islet cell autoantigen 1
										106604672	syntaxin-3-like
										106567096	hepatocyte nuclear factor 4-alpha-like
										106581182	hepatocyte nuclear factor 1-beta-A-like
										106612790	hepatocyte nuclear factor 1-beta-A-like
Head kidney	UP	Biological process	GO:0003341	cilium movement	5/416	11/10002	4.56046e-05	0.0020354	0.0018065	106575267	cilia and flagella associated protein 221
										106562220	dyslexia susceptibility 1 candidate 1
										106604960	cilia and flagella associated protein 46
										106563794	cilia and flagella associated protein 53
										106589610	coiled-coil domain-containing protein 151-like
Head kidney	UP	Biological process	GO:0009074	aromatic amino acid family catabolic process	5/416	12/10002	7.55161e-05	0.00292022	0.00259181	106561681	histidine ammonia-lyase
										106576798	kynurenine 3-monooxygenase-like
										106576224	histidine ammonia-lyase-like
										106590602	homogentisate 1,2-dioxygenase
										106609451	amidohydrolase domain containing 1
Head kidney	UP	Biological process	GO:0016054	organic acid catabolic process	10/416	55/10002	7.57605e-05	0.00292022	0.00259181	106582961	delta-1-pyrroline-5-carboxylate dehydrogenase, mitochondrial-like
										106578328	proline dehydrogenase 2
										106584046	N(G),N(G)-dimethylarginine dimethylaminohydrolase 1-like
										106605473	succinate-semialdehyde dehydrogenase, mitochondrial-like
										106561681	histidine ammonia-lyase
										106576798	kynurenine 3-monooxygenase-like
										106576224	histidine ammonia-lyase-like
										106590602	homogentisate 1,2-dioxygenase
										106609451	amidohydrolase domain containing 1
										106562090	glycine cleavage system H protein, mitochondrial-like
Head kidney	UP	Biological process	GO:0046395	carboxylic acid catabolic process	10/416	55/10002	7.57605e-05	0.00292022	0.00259181	106582961	delta-1-pyrroline-5-carboxylate dehydrogenase, mitochondrial-like
										106578328	proline dehydrogenase 2
										106584046	N(G),N(G)-dimethylarginine dimethylaminohydrolase 1-like
										106605473	succinate-semialdehyde dehydrogenase, mitochondrial-like
										106561681	histidine ammonia-lyase
										106576798	kynurenine 3-monooxygenase-like
										106576224	histidine ammonia-lyase-like
										106590602	homogentisate 1,2-dioxygenase
										106609451	amidohydrolase domain containing 1
										106562090	glycine cleavage system H protein, mitochondrial-like
Head kidney	UP	Biological process	GO:0044282	small molecule catabolic process	12/416	78/10002	8.21733e-05	0.00302969	0.00268897	106582961	delta-1-pyrroline-5-carboxylate dehydrogenase, mitochondrial-like
										106578328	proline dehydrogenase 2
										106584046	N(G),N(G)-dimethylarginine dimethylaminohydrolase 1-like
										106571110	cholesterol 24-hydroxylase-like
										106605473	succinate-semialdehyde dehydrogenase, mitochondrial-like
										106569008	cholesterol 7-alpha-monooxygenase-like
										106561681	histidine ammonia-lyase
										106576798	kynurenine 3-monooxygenase-like
										106576224	histidine ammonia-lyase-like
										106590602	homogentisate 1,2-dioxygenase
										106609451	amidohydrolase domain containing 1
										106562090	glycine cleavage system H protein, mitochondrial-like
Head kidney	UP	Biological process	GO:0002790	peptide secretion	7/416	27/10002	8.81558e-05	0.00311484	0.00276454	106565332	family with sequence similarity 3 member D
										106572609	hepatocyte nuclear factor 4-alpha-like
										100136586	HNF1 homeobox A
										100380590	Islet cell autoantigen 1
										106567096	hepatocyte nuclear factor 4-alpha-like
										106581182	hepatocyte nuclear factor 1-beta-A-like
										106612790	hepatocyte nuclear factor 1-beta-A-like
Head kidney	UP	Biological process	GO:0032787	monocarboxylic acid metabolic process	15/416	121/10002	0.000142243	0.00482488	0.00428226	100329172	delta-6 fatty acyl desaturase-like
										106596660	acetyl-coenzyme A synthetase, cytoplasmic-like
										106564456	4-aminobutyrate aminotransferase, mitochondrial-like
										106611776	malate synthase-like
										106605473	succinate-semialdehyde dehydrogenase, mitochondrial-like
										100195275	enoyl-CoA hydratase and 3-hydroxyacyl CoA dehydrogenase
										106580756	cytochrome P450 2M1
										106569008	cholesterol 7-alpha-monooxygenase-like
										106574012	elongation of very long chain fatty acids protein 4-like
										106606505	enolase family member 4
										106561681	histidine ammonia-lyase
										106576798	kynurenine 3-monooxygenase-like
										106576224	histidine ammonia-lyase-like
										106612435	putative hexokinase HKDC1
										100136522	aldolase b, fructose-bisphosphate
Head kidney	UP	Biological process	GO:0009064	glutamine family amino acid metabolic process	9/416	49/10002	0.000159563	0.0052042	0.00461892	106582961	delta-1-pyrroline-5-carboxylate dehydrogenase, mitochondrial-like
										106608869	ornithine aminotransferase, mitochondrial-like
										106578328	proline dehydrogenase 2
										106584046	N(G),N(G)-dimethylarginine dimethylaminohydrolase 1-like
										106583705	glutaminase kidney isoform, mitochondrial-like
										100196287	Arginase-1
										106561681	histidine ammonia-lyase
										106576224	histidine ammonia-lyase-like
										106609451	amidohydrolase domain containing 1
Head kidney	UP	Biological process	GO:0042737	drug catabolic process	5/416	16/10002	0.000362693	0.0109347	0.00970493	106571621	allantoicase
										106590602	homogentisate 1,2-dioxygenase
										106562090	glycine cleavage system H protein, mitochondrial-like
										106586175	catalase-like
										106564824	catalase-like
Head kidney	UP	Biological process	GO:0030001	metal ion transport	12/416	91/10002	0.000366524	0.0109347	0.00970493	106600764	ferritin, middle subunit-like
										106575754	sodium/potassium-transporting ATPase subunit beta-233-like
										100846967	Sodium/potassium-transporting ATPase subunit beta-1
										106572485	solute carrier family 13 member 3-like
										106600767	ferritin, middle subunit-like
										106567194	solute carrier family 13 member 3
										106600766	ferritin, middle subunit
										100195531	chloride intracellular channel 2
										100136391	sodium/potassium-transporting ATPase subunit beta-233
										106607810	scavenger receptor class A member 5-like
										106603573	solute carrier family 13 member 5
										106600951	ferritin, middle subunit
Head kidney	UP	Biological process	GO:0007018	microtubule-based movement	15/416	132/10002	0.000373945	0.0109347	0.00970493	106590219	kinesin-like protein KIF20A
										106609115	kinesin-like protein KIF21A
										106579813	dynein heavy chain 5, axonemal-like
										106600066	cytoplasmic dynein 1 intermediate chain 2-like
										106608824	dynein axonemal heavy chain 2
										106575267	cilia and flagella associated protein 221
										106562220	dyslexia susceptibility 1 candidate 1
										106604960	cilia and flagella associated protein 46
										106563794	cilia and flagella associated protein 53
										106581207	dynein heavy chain domain 1
										106589610	coiled-coil domain-containing protein 151-like
										106584978	dynein axonemal heavy chain 10
										106590182	kinesin family member 9
										106589485	dynein axonemal heavy chain 9
										106590358	dynein heavy chain 5, axonemal-like
Head kidney	UP	Biological process	GO:0016999	antibiotic metabolic process	10/416	67/10002	0.000411573	0.0116338	0.0103254	106612556	succinate dehydrogenase [ubiquinone] cytochrome b small subunit B, mitochondrial-like
										106561658	probable 2-oxoglutarate dehydrogenase E1 component DHKTD1, mitochondrial
										106596660	acetyl-coenzyme A synthetase, cytoplasmic-like
										106580927	succinate dehydrogenase [ubiquinone] cytochrome b small subunit B, mitochondrial-like
										106580756	cytochrome P450 2M1
										106611602	alcohol dehydrogenase class-3-like
										106561681	histidine ammonia-lyase
										106576224	histidine ammonia-lyase-like
										106586175	catalase-like
										106564824	catalase-like
Head kidney	UP	Biological process	GO:0006814	sodium ion transport	6/416	25/10002	0.000450568	0.0123252	0.0109391	106575754	sodium/potassium-transporting ATPase subunit beta-233-like
										100846967	Sodium/potassium-transporting ATPase subunit beta-1
										106572485	solute carrier family 13 member 3-like
										106567194	solute carrier family 13 member 3
										100136391	sodium/potassium-transporting ATPase subunit beta-233
										106603573	solute carrier family 13 member 5
Head kidney	UP	Biological process	GO:0046883	regulation of hormone secretion	4/416	10/10002	0.000507193	0.0130333	0.0115676	106565332	family with sequence similarity 3 member D
										106572609	hepatocyte nuclear factor 4-alpha-like
										100380590	Islet cell autoantigen 1
										106567096	hepatocyte nuclear factor 4-alpha-like
Head kidney	UP	Biological process	GO:0090276	regulation of peptide hormone secretion	4/416	10/10002	0.000507193	0.0130333	0.0115676	106565332	family with sequence similarity 3 member D
										106572609	hepatocyte nuclear factor 4-alpha-like
										100380590	Islet cell autoantigen 1
										106567096	hepatocyte nuclear factor 4-alpha-like
Head kidney	UP	Biological process	GO:0009306	protein secretion	6/416	26/10002	0.000565429	0.0141025	0.0125165	106572609	hepatocyte nuclear factor 4-alpha-like
										100136586	HNF1 homeobox A
										100380590	Islet cell autoantigen 1
										106567096	hepatocyte nuclear factor 4-alpha-like
										106581182	hepatocyte nuclear factor 1-beta-A-like
										106612790	hepatocyte nuclear factor 1-beta-A-like
Head kidney	UP	Biological process	GO:0042133	neurotransmitter metabolic process	5/416	18/10002	0.000664048	0.0160073	0.014207	106564456	4-aminobutyrate aminotransferase, mitochondrial-like
										106584046	N(G),N(G)-dimethylarginine dimethylaminohydrolase 1-like
										106605473	succinate-semialdehyde dehydrogenase, mitochondrial-like
										106566120	serine hydroxymethyltransferase 2
										106562090	glycine cleavage system H protein, mitochondrial-like
Head kidney	UP	Biological process	GO:0048513	animal organ development	13/416	111/10002	0.000679554	0.0160073	0.014207	106607949	POU domain, class 3, transcription factor 2-like
										106572609	hepatocyte nuclear factor 4-alpha-like
										100136586	HNF1 homeobox A
										106569804	xin actin-binding repeat-containing protein 1-like
										106574614	POU domain, class 3, transcription factor 3-B
										106567096	hepatocyte nuclear factor 4-alpha-like
										106586775	POU class 3 homeobox 3
										106565906	draxin-A
										106579100	mucin-13-like
										106581182	hepatocyte nuclear factor 1-beta-A-like
										106604525	platelet derived growth factor C
										106612790	hepatocyte nuclear factor 1-beta-A-like
										106579920	filamin-interacting protein FAM101A-like
Head kidney	UP	Biological process	GO:0032879	regulation of localization	16/416	158/10002	0.000875076	0.0200558	0.0178003	106588366	ectonucleotide pyrophosphatase/phosphodiesterase family member 2-like
										106613163	inward rectifier potassium channel 13-like
										106569443	matrix metalloproteinase-14-like
										106565332	family with sequence similarity 3 member D
										106572609	hepatocyte nuclear factor 4-alpha-like
										106599664	laminin subunit alpha-3-like
										106602061	inward rectifier potassium channel 16-like
										106606396	inward rectifier potassium channel 16-like
										106590346	laminin subunit alpha-1-like
										100380590	Islet cell autoantigen 1
										100195531	chloride intracellular channel 2
										106567096	hepatocyte nuclear factor 4-alpha-like
										106567683	ATP-sensitive inward rectifier potassium channel 15-like
										106576934	voltage-dependent calcium channel gamma-6 subunit-like
										106603448	ATP-sensitive inward rectifier potassium channel 15-like
										106612730	sodium/potassium-transporting ATPase subunit gamma-like
Head kidney	UP	Biological process	GO:0048878	chemical homeostasis	11/416	87/10002	0.00091498	0.0204185	0.0181222	106600764	ferritin, middle subunit-like
										106572609	hepatocyte nuclear factor 4-alpha-like
										106600767	ferritin, middle subunit-like
										106569008	cholesterol 7-alpha-monooxygenase-like
										106600766	ferritin, middle subunit
										100195531	chloride intracellular channel 2
										106567096	hepatocyte nuclear factor 4-alpha-like
										106612435	putative hexokinase HKDC1
										106607810	scavenger receptor class A member 5-like
										106583044	sodium/hydrogen exchanger 3-like
										106600951	ferritin, middle subunit
Head kidney	UP	Biological process	GO:0006812	cation transport	18/416	191/10002	0.0009977	0.0216936	0.0192539	106568452	trimeric intracellular cation channel type B-like
										100196793	solute carrier family 6 member 19
										106600764	ferritin, middle subunit-like
										106575754	sodium/potassium-transporting ATPase subunit beta-233-like
										106602876	ATP synthase subunit g, mitochondrial-like
										100846967	Sodium/potassium-transporting ATPase subunit beta-1
										106572485	solute carrier family 13 member 3-like
										106600767	ferritin, middle subunit-like
										106567194	solute carrier family 13 member 3
										106600766	ferritin, middle subunit
										100195531	chloride intracellular channel 2
										106563184	V-type proton ATPase 116 kDa subunit a isoform 2-like
										106590033	ATP synthase F(0) complex subunit C3, mitochondrial-like
										100136391	sodium/potassium-transporting ATPase subunit beta-233
										106607810	scavenger receptor class A member 5-like
										106603573	solute carrier family 13 member 5
										106607311	cytolysin RTX-A-like
										106600951	ferritin, middle subunit
Head kidney	UP	Biological process	GO:0008643	carbohydrate transport	6/416	29/10002	0.0010496	0.0217088	0.0192674	106565350	solute carrier family 2, facilitated glucose transporter member 11-like
										100136445	solute carrier family 2, facilitated glucose transporter member 1
										106563204	solute carrier family 2, facilitated glucose transporter member 11-like
										100196771	Solute carrier family 2, facilitated glucose transporter member 11
										106575464	solute carrier family 2, facilitated glucose transporter member 2-like
										106565846	solute carrier family 2, facilitated glucose transporter member 9-like
Head kidney	UP	Biological process	GO:0051187	cofactor catabolic process	6/416	29/10002	0.0010496	0.0217088	0.0192674	106568230	gamma-glutamyltranspeptidase 1-like
										106601950	putative L-aspartate dehydrogenase
										100195220	gamma-glutamyltransferase 1
										106585500	gamma-glutamyltransferase 5-like
										106586175	catalase-like
										106564824	catalase-like
Head kidney	UP	Biological process	GO:0072593	reactive oxygen species metabolic process	4/416	12/10002	0.00111868	0.0225867	0.0200465	106584046	N(G),N(G)-dimethylarginine dimethylaminohydrolase 1-like
										106604810	cytochrome b-245 heavy chain-like
										106586175	catalase-like
										106564824	catalase-like
Head kidney	UP	Biological process	GO:0007420	brain development	4/416	13/10002	0.00156319	0.0294574	0.0261445	106607949	POU domain, class 3, transcription factor 2-like
										106574614	POU domain, class 3, transcription factor 3-B
										106586775	POU class 3 homeobox 3
										106565906	draxin-A
Head kidney	UP	Biological process	GO:0030855	epithelial cell differentiation	4/416	13/10002	0.00156319	0.0294574	0.0261445	106572609	hepatocyte nuclear factor 4-alpha-like
										106567096	hepatocyte nuclear factor 4-alpha-like
										106583498	ETS-related transcription factor Elf-3-like
										106565106	ETS-related transcription factor Elf-3-like
Head kidney	UP	Biological process	GO:0060322	head development	4/416	13/10002	0.00156319	0.0294574	0.0261445	106607949	POU domain, class 3, transcription factor 2-like
										106574614	POU domain, class 3, transcription factor 3-B
										106586775	POU class 3 homeobox 3
										106565906	draxin-A
Head kidney	UP	Biological process	GO:0043648	dicarboxylic acid metabolic process	5/416	22/10002	0.00177891	0.0327938	0.0291057	106582961	delta-1-pyrroline-5-carboxylate dehydrogenase, mitochondrial-like
										106561681	histidine ammonia-lyase
										106576798	kynurenine 3-monooxygenase-like
										106576224	histidine ammonia-lyase-like
										106609451	amidohydrolase domain containing 1
Head kidney	UP	Biological process	GO:0006928	movement of cell or subcellular component	20/416	239/10002	0.00229473	0.0414027	0.0367465	106590219	kinesin-like protein KIF20A
										106588366	ectonucleotide pyrophosphatase/phosphodiesterase family member 2-like
										106609115	kinesin-like protein KIF21A
										106579813	dynein heavy chain 5, axonemal-like
										106569443	matrix metalloproteinase-14-like
										106600066	cytoplasmic dynein 1 intermediate chain 2-like
										106608824	dynein axonemal heavy chain 2
										106575267	cilia and flagella associated protein 221
										106599664	laminin subunit alpha-3-like
										106562220	dyslexia susceptibility 1 candidate 1
										106604960	cilia and flagella associated protein 46
										106590346	laminin subunit alpha-1-like
										106563794	cilia and flagella associated protein 53
										106581207	dynein heavy chain domain 1
										106589610	coiled-coil domain-containing protein 151-like
										106584978	dynein axonemal heavy chain 10
										106590182	kinesin family member 9
										106565906	draxin-A
										106589485	dynein axonemal heavy chain 9
										106590358	dynein heavy chain 5, axonemal-like
Head kidney	UP	Biological process	GO:0006826	iron ion transport	5/416	24/10002	0.00268116	0.0473671	0.04204	106600764	ferritin, middle subunit-like
										106600767	ferritin, middle subunit-like
										106600766	ferritin, middle subunit
										106607810	scavenger receptor class A member 5-like
										106600951	ferritin, middle subunit
Head kidney	UP	Cellular component	GO:0031514	motile cilium	13/627	50/12100	1.03067e-06	0.000174182	0.000159482	106606481	cilia and flagella associated protein 70
										106598390	cilia- and flagella-associated protein 57-like
										106607033	intraflagellar transport protein 56-like
										106571264	cilia and flagella associated protein 61
										106575267	cilia and flagella associated protein 221
										100195749	sperm flagellar 1
										106604960	cilia and flagella associated protein 46
										106566881	cilia and flagella associated protein 74
										106570378	cilia and flagella associated protein 69
										106563794	cilia and flagella associated protein 53
										106610989	cilia and flagella associated protein 99
										106612979	cilia- and flagella-associated protein 45-like
										106581109	cilia- and flagella-associated protein 45-like
Head kidney	UP	Cellular component	GO:0005923	bicellular tight junction	11/627	43/12100	8.33822e-06	0.00046972	0.000430076	106586543	claudin-14-like
										106612824	claudin-4-like
										106603209	claudin-7-B-like
										106608766	claudin-15-like
										106613722	tight junction protein ZO-3-like
										106582444	claudin-10-like
										106563775	claudin-3-like
										106581059	claudin-3-like
										106612823	claudin-3-like
										106581058	claudin-3-like
										100306741	Claudin-like protein ZF4A22
Head kidney	UP	Cellular component	GO:0043296	apical junction complex	11/627	43/12100	8.33822e-06	0.00046972	0.000430076	106586543	claudin-14-like
										106612824	claudin-4-like
										106603209	claudin-7-B-like
										106608766	claudin-15-like
										106613722	tight junction protein ZO-3-like
										106582444	claudin-10-like
										106563775	claudin-3-like
										106581059	claudin-3-like
										106612823	claudin-3-like
										106581058	claudin-3-like
										100306741	Claudin-like protein ZF4A22
Head kidney	UP	Cellular component	GO:0070160	tight junction	11/627	45/12100	1.3385e-05	0.000565518	0.00051779	106586543	claudin-14-like
										106612824	claudin-4-like
										106603209	claudin-7-B-like
										106608766	claudin-15-like
										106613722	tight junction protein ZO-3-like
										106582444	claudin-10-like
										106563775	claudin-3-like
										106581059	claudin-3-like
										106612823	claudin-3-like
										106581058	claudin-3-like
										100306741	Claudin-like protein ZF4A22
Head kidney	UP	Cellular component	GO:0005929	cilium	15/627	91/12100	6.17272e-05	0.00208638	0.00191029	106606481	cilia and flagella associated protein 70
										106598390	cilia- and flagella-associated protein 57-like
										106607033	intraflagellar transport protein 56-like
										106571264	cilia and flagella associated protein 61
										106575267	cilia and flagella associated protein 221
										100195749	sperm flagellar 1
										106604960	cilia and flagella associated protein 46
										106566881	cilia and flagella associated protein 74
										106570378	cilia and flagella associated protein 69
										106571766	dynein regulatory complex subunit 1
										106563794	cilia and flagella associated protein 53
										106589610	coiled-coil domain-containing protein 151-like
										106610989	cilia and flagella associated protein 99
										106612979	cilia- and flagella-associated protein 45-like
										106581109	cilia- and flagella-associated protein 45-like
Head kidney	UP	Cellular component	GO:0005911	cell-cell junction	15/627	93/12100	7.98853e-05	0.0022501	0.0020602	106569336	gap junction protein gamma 2
										106586543	claudin-14-like
										106612824	claudin-4-like
										106603209	claudin-7-B-like
										100195632	Gap junction Cx32.2 protein
										106608766	claudin-15-like
										106613722	tight junction protein ZO-3-like
										106582444	claudin-10-like
										100306831	plakophilin 3
										106563775	claudin-3-like
										106581059	claudin-3-like
										106612823	claudin-3-like
										106581058	claudin-3-like
										100306741	Claudin-like protein ZF4A22
										106612612	gap junction delta-2 protein-like
Head kidney	UP	Cellular component	GO:0120025	plasma membrane bounded cell projection	16/627	119/12100	0.000413149	0.0085324	0.00781229	106606481	cilia and flagella associated protein 70
										106598390	cilia- and flagella-associated protein 57-like
										106607033	intraflagellar transport protein 56-like
										106571264	cilia and flagella associated protein 61
										106575267	cilia and flagella associated protein 221
										100195749	sperm flagellar 1
										106604960	cilia and flagella associated protein 46
										106566881	cilia and flagella associated protein 74
										106570378	cilia and flagella associated protein 69
										106571766	dynein regulatory complex subunit 1
										106563794	cilia and flagella associated protein 53
										106589610	coiled-coil domain-containing protein 151-like
										106610989	cilia and flagella associated protein 99
										106612979	cilia- and flagella-associated protein 45-like
										106581109	cilia- and flagella-associated protein 45-like
										106600435	aquaporin FA-CHIP-like
Head kidney	UP	Cellular component	GO:0030054	cell junction	18/627	143/12100	0.00042056	0.0085324	0.00781229	106604681	neuronal acetylcholine receptor subunit alpha-7-like
										106569336	gap junction protein gamma 2
										106586543	claudin-14-like
										106611786	neuronal acetylcholine receptor subunit alpha-7-like
										106612824	claudin-4-like
										106603209	claudin-7-B-like
										100195632	Gap junction Cx32.2 protein
										106608766	claudin-15-like
										106613722	tight junction protein ZO-3-like
										106582444	claudin-10-like
										100306831	plakophilin 3
										106563775	claudin-3-like
										106581059	claudin-3-like
										106612823	claudin-3-like
										106581058	claudin-3-like
										106567580	glutamate receptor 4
										100306741	Claudin-like protein ZF4A22
										106612612	gap junction delta-2 protein-like
Head kidney	UP	Cellular component	GO:0042995	cell projection	16/627	120/12100	0.000454388	0.0085324	0.00781229	106606481	cilia and flagella associated protein 70
										106598390	cilia- and flagella-associated protein 57-like
										106607033	intraflagellar transport protein 56-like
										106571264	cilia and flagella associated protein 61
										106575267	cilia and flagella associated protein 221
										100195749	sperm flagellar 1
										106604960	cilia and flagella associated protein 46
										106566881	cilia and flagella associated protein 74
										106570378	cilia and flagella associated protein 69
										106571766	dynein regulatory complex subunit 1
										106563794	cilia and flagella associated protein 53
										106589610	coiled-coil domain-containing protein 151-like
										106610989	cilia and flagella associated protein 99
										106612979	cilia- and flagella-associated protein 45-like
										106581109	cilia- and flagella-associated protein 45-like
										106600435	aquaporin FA-CHIP-like
Head kidney	UP	Cellular component	GO:0030286	dynein complex	8/627	42/12100	0.00122576	0.0207153	0.018967	106579813	dynein heavy chain 5, axonemal-like
										106600066	cytoplasmic dynein 1 intermediate chain 2-like
										106608824	dynein axonemal heavy chain 2
										106571766	dynein regulatory complex subunit 1
										106581207	dynein heavy chain domain 1
										106584978	dynein axonemal heavy chain 10
										106589485	dynein axonemal heavy chain 9
										106590358	dynein heavy chain 5, axonemal-like
Head kidney	UP	Cellular component	GO:0044459	plasma membrane part	33/627	373/12100	0.00186844	0.028706	0.0262833	106604681	neuronal acetylcholine receptor subunit alpha-7-like
										106569336	gap junction protein gamma 2
										106572237	ephrin type-B receptor 2-like
										106588794	integrin beta-8-like
										100380695	solute carrier family 28 member 3
										106561167	sodium/nucleoside cotransporter 2-like
										106563502	sulfate transporter-like
										106606915	potassium voltage-gated channel subfamily KQT member 5-like
										106613567	podocin-like
										106605397	epithelial discoidin domain-containing receptor 1-like
										100195688	Guanine nucleotide-binding protein GI/GS/GO subunit gamma-8
										106575754	sodium/potassium-transporting ATPase subunit beta-233-like
										106576843	ATP binding cassette subfamily C member 2
										106611786	neuronal acetylcholine receptor subunit alpha-7-like
										106612824	claudin-4-like
										100846967	Sodium/potassium-transporting ATPase subunit beta-1
										100195632	Gap junction Cx32.2 protein
										106602505	cation channel sperm associated auxiliary subunit beta
										106588862	transmembrane channel-like protein 5
										106586229	integrin alpha-6-like
										106582986	ephrin type-B receptor 2-like
										106563433	extensin-1-like
										100380357	Sulfate transporter
										106570711	sodium-dependent neutral amino acid transporter B(0)AT1-like
										106576934	voltage-dependent calcium channel gamma-6 subunit-like
										100136391	sodium/potassium-transporting ATPase subunit beta-233
										106567580	glutamate receptor 4
										106607810	scavenger receptor class A member 5-like
										106588229	riboflavin transporter 2-like
										106570712	sodium-dependent neutral amino acid transporter B(0)AT3-like
										106612612	gap junction delta-2 protein-like
										106600435	aquaporin FA-CHIP-like
										106575572	sodium/potassium-transporting ATPase subunit alpha-1-like
Head kidney	UP	Molecular function	GO:0048037	cofactor binding	52/721	464/16726	2.67833e-10	9.64197e-08	7.02003e-08	106608869	ornithine aminotransferase, mitochondrial-like
										106571832	androglobin
										106561658	probable 2-oxoglutarate dehydrogenase E1 component DHKTD1, mitochondrial
										100196697	isovaleryl Coenzyme A dehydrogenase
										106600424	alanine aminotransferase 2-like
										106601402	cytoglobin-2-like
										106564456	4-aminobutyrate aminotransferase, mitochondrial-like
										106571110	cholesterol 24-hydroxylase-like
										106586421	sterol 26-hydroxylase, mitochondrial-like
										106570209	lanosterol 14-alpha demethylase-like
										100194819	acyl-CoA dehydrogenase family member 11
										106576803	cytochrome P450 1B1-like
										106560235	delta(24)-sterol reductase-like
										106569335	5-beta-cholestane-3-alpha,7-alpha-diol 12-alpha-hydroxylase-like
										106573756	aspartate aminotransferase, mitochondrial-like
										106566120	serine hydroxymethyltransferase 2
										106613967	dimethylaniline monooxygenase [N-oxide-forming] 5-like
										100380763	xanthine dehydrogenase
										106574430	acyl-CoA-binding protein-like
										106572705	glucose-6-phosphate 1-dehydrogenase-like
										106602559	cytochrome P450 4V2-like
										106580756	cytochrome P450 2M1
										106573203	cytochrome P450 2F2-like
										106569008	cholesterol 7-alpha-monooxygenase-like
										100380379	neuroglobin
										106577060	prolyl 4-hydroxylase subunit alpha-1-like
										106586750	NADP-dependent malic enzyme, mitochondrial-like
										106560421	alanine aminotransferase 2-like
										106575269	acyl-CoA-binding protein-like
										100196048	Hydroxyacid oxidase 2
										106608020	cytochrome P450 2K1-like
										106599889	5-beta-cholestane-3-alpha,7-alpha-diol 12-alpha-hydroxylase-like
										106576798	kynurenine 3-monooxygenase-like
										106604402	CDGSH iron-sulfur domain-containing protein 1-like
										100194964	Cystathionine gamma-lyase
										106599438	25-hydroxycholesterol 7-alpha-hydroxylase-like
										106561367	NADH dehydrogenase [ubiquinone] 1 alpha subcomplex subunit 9, mitochondrial-like
										106577459	ethanolamine-phosphate phospho-lyase-like
										100194766	flavin containing monooxygenase 5
										106601062	L-serine dehydratase/L-threonine deaminase-like
										106586175	catalase-like
										100196746	hydroxyacid oxidase 1
										106591720	iron-sulfur cluster assembly 2 homolog, mitochondrial-like
										106601078	hemoglobin subunit alpha-like
										106583422	Rieske domain-containing protein-like
										106564824	catalase-like
										106587910	CDGSH iron-sulfur domain-containing protein 3, mitochondrial-like
										106572153	5'-aminolevulinate synthase 2
										106580394	L-serine dehydratase/L-threonine deaminase-like
										106601073	hemoglobin subunit beta-1-like
										101448011	Hemoglobin subunit beta-1
										100194731	primary amine oxidase, liver isozyme
Head kidney	UP	Molecular function	GO:0015291	secondary active transmembrane transporter activity	25/721	141/16726	1.53783e-09	2.76809e-07	2.01537e-07	106567993	sodium- and chloride-dependent GABA transporter ine-like
										106566494	solute carrier family 6 member 8
										106567643	sodium- and chloride-dependent GABA transporter 2-like
										106581333	sodium- and chloride-dependent GABA transporter 2-like
										100196793	solute carrier family 6 member 19
										106561167	sodium/nucleoside cotransporter 2-like
										106563502	sulfate transporter-like
										106601647	band 3 anion exchange protein-like
										106575953	sodium- and chloride-dependent GABA transporter 2-like
										106603691	sodium/calcium exchanger 2-like
										106581173	multidrug and toxin extrusion protein 1-like
										106565344	sodium- and chloride-dependent GABA transporter 2-like
										100195195	Sodium-dependent phosphate transporter 1-A
										106608636	excitatory amino acid transporter 3-like
										106563433	extensin-1-like
										100380357	Sulfate transporter
										106570711	sodium-dependent neutral amino acid transporter B(0)AT1-like
										106612938	multidrug and toxin extrusion protein 1-like
										106567422	solute carrier family 23 member 1-like
										106566781	solute carrier family 26 member 6-like
										106606869	band 3 anion exchange protein-like
										106570712	sodium-dependent neutral amino acid transporter B(0)AT3-like
										106588989	sodium- and chloride-dependent GABA transporter 1-like
										106560848	solute carrier family 12 member 3-like
										106583044	sodium/hydrogen exchanger 3-like
Head kidney	UP	Molecular function	GO:0005506	iron ion binding	25/721	148/16726	4.348e-09	5.2176e-07	3.79878e-07	100196492	cysteine dioxygenase type 1
										106601402	cytoglobin-2-like
										106571110	cholesterol 24-hydroxylase-like
										106586421	sterol 26-hydroxylase, mitochondrial-like
										106570209	lanosterol 14-alpha demethylase-like
										106582276	alkylglycerol monooxygenase-like
										106600764	ferritin, middle subunit-like
										106576803	cytochrome P450 1B1-like
										106569335	5-beta-cholestane-3-alpha,7-alpha-diol 12-alpha-hydroxylase-like
										100380763	xanthine dehydrogenase
										106560689	protein phosphatase with EF-hand domain 2
										106600767	ferritin, middle subunit-like
										106602559	cytochrome P450 4V2-like
										106580756	cytochrome P450 2M1
										106573203	cytochrome P450 2F2-like
										106569008	cholesterol 7-alpha-monooxygenase-like
										106577060	prolyl 4-hydroxylase subunit alpha-1-like
										106600766	ferritin, middle subunit
										106608020	cytochrome P450 2K1-like
										106599889	5-beta-cholestane-3-alpha,7-alpha-diol 12-alpha-hydroxylase-like
										106603194	trimethyllysine dioxygenase, mitochondrial-like
										106610314	hydroperoxide isomerase ALOXE3-like
										106599438	25-hydroxycholesterol 7-alpha-hydroxylase-like
										106601078	hemoglobin subunit alpha-like
										106600951	ferritin, middle subunit
Head kidney	UP	Molecular function	GO:0004497	monooxygenase activity	17/721	82/16726	5.95285e-08	5.35756e-06	3.90068e-06	106571110	cholesterol 24-hydroxylase-like
										106586421	sterol 26-hydroxylase, mitochondrial-like
										106570209	lanosterol 14-alpha demethylase-like
										106582276	alkylglycerol monooxygenase-like
										106576803	cytochrome P450 1B1-like
										106569335	5-beta-cholestane-3-alpha,7-alpha-diol 12-alpha-hydroxylase-like
										106613967	dimethylaniline monooxygenase [N-oxide-forming] 5-like
										106602919	putative monooxygenase p33MONOX
										106602559	cytochrome P450 4V2-like
										106580756	cytochrome P450 2M1
										106573203	cytochrome P450 2F2-like
										106569008	cholesterol 7-alpha-monooxygenase-like
										106608020	cytochrome P450 2K1-like
										106599889	5-beta-cholestane-3-alpha,7-alpha-diol 12-alpha-hydroxylase-like
										106576798	kynurenine 3-monooxygenase-like
										106599438	25-hydroxycholesterol 7-alpha-hydroxylase-like
										100194766	flavin containing monooxygenase 5
Head kidney	UP	Molecular function	GO:0020037	heme binding	20/721	116/16726	1.07691e-07	7.75374e-06	5.64526e-06	106571832	androglobin
										106601402	cytoglobin-2-like
										106571110	cholesterol 24-hydroxylase-like
										106586421	sterol 26-hydroxylase, mitochondrial-like
										106570209	lanosterol 14-alpha demethylase-like
										106576803	cytochrome P450 1B1-like
										106569335	5-beta-cholestane-3-alpha,7-alpha-diol 12-alpha-hydroxylase-like
										106602559	cytochrome P450 4V2-like
										106580756	cytochrome P450 2M1
										106573203	cytochrome P450 2F2-like
										106569008	cholesterol 7-alpha-monooxygenase-like
										100380379	neuroglobin
										106608020	cytochrome P450 2K1-like
										106599889	5-beta-cholestane-3-alpha,7-alpha-diol 12-alpha-hydroxylase-like
										106599438	25-hydroxycholesterol 7-alpha-hydroxylase-like
										106586175	catalase-like
										106601078	hemoglobin subunit alpha-like
										106564824	catalase-like
										106601073	hemoglobin subunit beta-1-like
										101448011	Hemoglobin subunit beta-1
Head kidney	UP	Molecular function	GO:0046906	tetrapyrrole binding	20/721	120/16726	1.91822e-07	1.15093e-05	8.37961e-06	106571832	androglobin
										106601402	cytoglobin-2-like
										106571110	cholesterol 24-hydroxylase-like
										106586421	sterol 26-hydroxylase, mitochondrial-like
										106570209	lanosterol 14-alpha demethylase-like
										106576803	cytochrome P450 1B1-like
										106569335	5-beta-cholestane-3-alpha,7-alpha-diol 12-alpha-hydroxylase-like
										106602559	cytochrome P450 4V2-like
										106580756	cytochrome P450 2M1
										106573203	cytochrome P450 2F2-like
										106569008	cholesterol 7-alpha-monooxygenase-like
										100380379	neuroglobin
										106608020	cytochrome P450 2K1-like
										106599889	5-beta-cholestane-3-alpha,7-alpha-diol 12-alpha-hydroxylase-like
										106599438	25-hydroxycholesterol 7-alpha-hydroxylase-like
										106586175	catalase-like
										106601078	hemoglobin subunit alpha-like
										106564824	catalase-like
										106601073	hemoglobin subunit beta-1-like
										101448011	Hemoglobin subunit beta-1
Head kidney	UP	Molecular function	GO:0043565	sequence-specific DNA binding	42/721	416/16726	2.77611e-07	1.42771e-05	1.03948e-05	106562437	iroquois-class homeodomain protein irx-3-like
										100136415	peroxisome proliferator-activated receptor alpha
										106576270	transcription factor Spi-C-like
										106579328	ETS translocation variant 4-like
										106573127	iroquois homeobox 2
										106607949	POU domain, class 3, transcription factor 2-like
										100194490	homeobox protein HoxB6ab
										106607488	homeobox protein Hox-B10a-like
										106572609	hepatocyte nuclear factor 4-alpha-like
										106583301	forkhead box protein O3-like
										100136356	fork head domain protein
										106589554	forkhead box protein J1-B-like
										106588712	homeobox protein MOX-2-like
										100194435	homeobox protein HoxC8aa
										106604710	forkhead box protein N2-like
										106574614	POU domain, class 3, transcription factor 3-B
										100196638	homeobox protein HoxC6ba
										100136393	peroxisome proliferator activated receptor gamma
										100195881	Homeobox protein Hox-B7a
										100846972	estrogen receptor beta 2
										100170848	homeobox protein HoxA10ab
										106567096	hepatocyte nuclear factor 4-alpha-like
										100196704	empty spiracles homeobox 2
										106586775	POU class 3 homeobox 3
										106573302	bile acid receptor-like
										106562982	NK1 transcription factor-related protein 2-like
										106583498	ETS-related transcription factor Elf-3-like
										106601528	forkhead box protein J1-A-like
										100194434	homeobox protein HoxC9aa
										106590549	hepatocyte nuclear factor 4-gamma-like
										106611051	steroid hormone receptor ERR2-like
										100194484	homeobox protein HoxB8aa
										106588846	homeobox protein Hox-A9-like
										106600834	homeobox protein Hox-B10a-like
										106611759	forkhead box protein N3-like
										106565106	ETS-related transcription factor Elf-3-like
										100194471	homeobox protein HoxA7aa
										106600835	homeobox protein Hox-B9a-like
										106584377	forkhead box protein D2-like
										100194489	homeobox protein HoxB8ab
										100194442	homeobox protein HoxC8an
										100194477	homeobox protein HoxA7ab
Head kidney	UP	Molecular function	GO:0008324	cation transmembrane transporter activity	42/721	424/16726	4.64333e-07	1.90998e-05	1.3906e-05	106604681	neuronal acetylcholine receptor subunit alpha-7-like
										106567993	sodium- and chloride-dependent GABA transporter ine-like
										106566494	solute carrier family 6 member 8
										106613163	inward rectifier potassium channel 13-like
										106567643	sodium- and chloride-dependent GABA transporter 2-like
										106581333	sodium- and chloride-dependent GABA transporter 2-like
										106568452	trimeric intracellular cation channel type B-like
										100196793	solute carrier family 6 member 19
										106561167	sodium/nucleoside cotransporter 2-like
										106606915	potassium voltage-gated channel subfamily KQT member 5-like
										106565625	solute carrier family 41 member 1-like
										106611786	neuronal acetylcholine receptor subunit alpha-7-like
										100195745	Potassium channel subfamily K member 15
										106602876	ATP synthase subunit g, mitochondrial-like
										106575953	sodium- and chloride-dependent GABA transporter 2-like
										106603691	sodium/calcium exchanger 2-like
										106602061	inward rectifier potassium channel 16-like
										106606396	inward rectifier potassium channel 16-like
										106565344	sodium- and chloride-dependent GABA transporter 2-like
										106580069	transient receptor potential cation channel subfamily M member 7-like
										106606889	cytochrome c oxidase subunit 6A, mitochondrial
										106560446	mucolipin-3-like
										106571195	ammonium transporter Rh type A-like
										106563184	V-type proton ATPase 116 kDa subunit a isoform 2-like
										106567683	ATP-sensitive inward rectifier potassium channel 15-like
										100196095	Rhesus blood group, B glycoprotein
										106570711	sodium-dependent neutral amino acid transporter B(0)AT1-like
										106567422	solute carrier family 23 member 1-like
										106576934	voltage-dependent calcium channel gamma-6 subunit-like
										106606878	cytochrome c oxidase subunit 6A, mitochondrial-like
										106590033	ATP synthase F(0) complex subunit C3, mitochondrial-like
										106568959	small conductance calcium-activated potassium channel protein 2-like
										106586588	transmembrane protein 37
										106580767	cytochrome c oxidase subunit 7A2, mitochondrial-like
										106570712	sodium-dependent neutral amino acid transporter B(0)AT3-like
										106588989	sodium- and chloride-dependent GABA transporter 1-like
										106603448	ATP-sensitive inward rectifier potassium channel 15-like
										106560848	solute carrier family 12 member 3-like
										106583044	sodium/hydrogen exchanger 3-like
										100136390	sodium/potassium-transporting ATPase subunit alpha-1
										106575572	sodium/potassium-transporting ATPase subunit alpha-1-like
										106612682	cytochrome c oxidase subunit 7A2, mitochondrial-like
Head kidney	UP	Molecular function	GO:0016829	lyase activity	23/721	162/16726	4.77495e-07	1.90998e-05	1.3906e-05	106609334	histidine ammonia-lyase-like
										106599341	carbonic anhydrase-like
										106609363	heat-stable enterotoxin receptor-like
										106564335	4-hydroxy-2-oxoglutarate aldolase, mitochondrial-like
										106608461	triokinase and FMN cyclase
										100195268	carbonic anhydrase
										100196396	Troponin C-akin-1 protein
										106581616	aconitate decarboxylase 1
										106591168	4-hydroxy-2-oxoglutarate aldolase 1
										106582398	aminocarboxymuconate semialdehyde decarboxylase
										106606505	enolase family member 4
										106561681	histidine ammonia-lyase
										100195420	phosphoenolpyruvate carboxykinase 1
										106608189	lactoylglutathione lyase-like
										106576224	histidine ammonia-lyase-like
										106571618	carbonic anhydrase 14-like
										100194964	Cystathionine gamma-lyase
										100195823	Delta-aminolevulinic acid dehydratase
										100136522	aldolase b, fructose-bisphosphate
										100195397	4-hydroxyphenylpyruvate dioxygenase
										106577459	ethanolamine-phosphate phospho-lyase-like
										106590260	phosphoenolpyruvate carboxykinase 2, mitochondrial
										106612801	carbonic anhydrase 4-like
Head kidney	UP	Molecular function	GO:0015077	monovalent inorganic cation transmembrane transporter activity	31/721	270/16726	6.81482e-07	2.45334e-05	1.7862e-05	106567993	sodium- and chloride-dependent GABA transporter ine-like
										106566494	solute carrier family 6 member 8
										106613163	inward rectifier potassium channel 13-like
										106567643	sodium- and chloride-dependent GABA transporter 2-like
										106581333	sodium- and chloride-dependent GABA transporter 2-like
										100196793	solute carrier family 6 member 19
										106561167	sodium/nucleoside cotransporter 2-like
										106606915	potassium voltage-gated channel subfamily KQT member 5-like
										100195745	Potassium channel subfamily K member 15
										106602876	ATP synthase subunit g, mitochondrial-like
										106575953	sodium- and chloride-dependent GABA transporter 2-like
										106603691	sodium/calcium exchanger 2-like
										106602061	inward rectifier potassium channel 16-like
										106606396	inward rectifier potassium channel 16-like
										106565344	sodium- and chloride-dependent GABA transporter 2-like
										106606889	cytochrome c oxidase subunit 6A, mitochondrial
										106563184	V-type proton ATPase 116 kDa subunit a isoform 2-like
										106567683	ATP-sensitive inward rectifier potassium channel 15-like
										106570711	sodium-dependent neutral amino acid transporter B(0)AT1-like
										106567422	solute carrier family 23 member 1-like
										106606878	cytochrome c oxidase subunit 6A, mitochondrial-like
										106590033	ATP synthase F(0) complex subunit C3, mitochondrial-like
										106568959	small conductance calcium-activated potassium channel protein 2-like
										106580767	cytochrome c oxidase subunit 7A2, mitochondrial-like
										106570712	sodium-dependent neutral amino acid transporter B(0)AT3-like
										106588989	sodium- and chloride-dependent GABA transporter 1-like
										106603448	ATP-sensitive inward rectifier potassium channel 15-like
										106583044	sodium/hydrogen exchanger 3-like
										100136390	sodium/potassium-transporting ATPase subunit alpha-1
										106575572	sodium/potassium-transporting ATPase subunit alpha-1-like
										106612682	cytochrome c oxidase subunit 7A2, mitochondrial-like
Head kidney	UP	Molecular function	GO:0015370	solute:sodium symporter activity	12/721	50/16726	1.00882e-06	3.30159e-05	2.40379e-05	106567993	sodium- and chloride-dependent GABA transporter ine-like
										106566494	solute carrier family 6 member 8
										106567643	sodium- and chloride-dependent GABA transporter 2-like
										106581333	sodium- and chloride-dependent GABA transporter 2-like
										100196793	solute carrier family 6 member 19
										106561167	sodium/nucleoside cotransporter 2-like
										106575953	sodium- and chloride-dependent GABA transporter 2-like
										106565344	sodium- and chloride-dependent GABA transporter 2-like
										106570711	sodium-dependent neutral amino acid transporter B(0)AT1-like
										106567422	solute carrier family 23 member 1-like
										106570712	sodium-dependent neutral amino acid transporter B(0)AT3-like
										106588989	sodium- and chloride-dependent GABA transporter 1-like
Head kidney	UP	Molecular function	GO:0015081	sodium ion transmembrane transporter activity	15/721	79/16726	1.17507e-06	3.49591e-05	2.54527e-05	106567993	sodium- and chloride-dependent GABA transporter ine-like
										106566494	solute carrier family 6 member 8
										106567643	sodium- and chloride-dependent GABA transporter 2-like
										106581333	sodium- and chloride-dependent GABA transporter 2-like
										100196793	solute carrier family 6 member 19
										106561167	sodium/nucleoside cotransporter 2-like
										106575953	sodium- and chloride-dependent GABA transporter 2-like
										106603691	sodium/calcium exchanger 2-like
										106565344	sodium- and chloride-dependent GABA transporter 2-like
										106570711	sodium-dependent neutral amino acid transporter B(0)AT1-like
										106567422	solute carrier family 23 member 1-like
										106570712	sodium-dependent neutral amino acid transporter B(0)AT3-like
										106588989	sodium- and chloride-dependent GABA transporter 1-like
										106583044	sodium/hydrogen exchanger 3-like
										106575572	sodium/potassium-transporting ATPase subunit alpha-1-like
Head kidney	UP	Molecular function	GO:0015294	solute:cation symporter activity	13/721	60/16726	1.26241e-06	3.49591e-05	2.54527e-05	106567993	sodium- and chloride-dependent GABA transporter ine-like
										106566494	solute carrier family 6 member 8
										106567643	sodium- and chloride-dependent GABA transporter 2-like
										106581333	sodium- and chloride-dependent GABA transporter 2-like
										100196793	solute carrier family 6 member 19
										106561167	sodium/nucleoside cotransporter 2-like
										106575953	sodium- and chloride-dependent GABA transporter 2-like
										106565344	sodium- and chloride-dependent GABA transporter 2-like
										106570711	sodium-dependent neutral amino acid transporter B(0)AT1-like
										106567422	solute carrier family 23 member 1-like
										106570712	sodium-dependent neutral amino acid transporter B(0)AT3-like
										106588989	sodium- and chloride-dependent GABA transporter 1-like
										106560848	solute carrier family 12 member 3-like
Head kidney	UP	Molecular function	GO:0022890	inorganic cation transmembrane transporter activity	39/721	400/16726	1.76993e-06	4.55126e-05	3.31363e-05	106604681	neuronal acetylcholine receptor subunit alpha-7-like
										106567993	sodium- and chloride-dependent GABA transporter ine-like
										106566494	solute carrier family 6 member 8
										106613163	inward rectifier potassium channel 13-like
										106567643	sodium- and chloride-dependent GABA transporter 2-like
										106581333	sodium- and chloride-dependent GABA transporter 2-like
										106568452	trimeric intracellular cation channel type B-like
										100196793	solute carrier family 6 member 19
										106561167	sodium/nucleoside cotransporter 2-like
										106606915	potassium voltage-gated channel subfamily KQT member 5-like
										106611786	neuronal acetylcholine receptor subunit alpha-7-like
										100195745	Potassium channel subfamily K member 15
										106602876	ATP synthase subunit g, mitochondrial-like
										106575953	sodium- and chloride-dependent GABA transporter 2-like
										106603691	sodium/calcium exchanger 2-like
										106602061	inward rectifier potassium channel 16-like
										106606396	inward rectifier potassium channel 16-like
										106565344	sodium- and chloride-dependent GABA transporter 2-like
										106580069	transient receptor potential cation channel subfamily M member 7-like
										106606889	cytochrome c oxidase subunit 6A, mitochondrial
										106560446	mucolipin-3-like
										106563184	V-type proton ATPase 116 kDa subunit a isoform 2-like
										106567683	ATP-sensitive inward rectifier potassium channel 15-like
										106570711	sodium-dependent neutral amino acid transporter B(0)AT1-like
										106567422	solute carrier family 23 member 1-like
										106576934	voltage-dependent calcium channel gamma-6 subunit-like
										106606878	cytochrome c oxidase subunit 6A, mitochondrial-like
										106590033	ATP synthase F(0) complex subunit C3, mitochondrial-like
										106568959	small conductance calcium-activated potassium channel protein 2-like
										106586588	transmembrane protein 37
										106580767	cytochrome c oxidase subunit 7A2, mitochondrial-like
										106570712	sodium-dependent neutral amino acid transporter B(0)AT3-like
										106588989	sodium- and chloride-dependent GABA transporter 1-like
										106603448	ATP-sensitive inward rectifier potassium channel 15-like
										106560848	solute carrier family 12 member 3-like
										106583044	sodium/hydrogen exchanger 3-like
										100136390	sodium/potassium-transporting ATPase subunit alpha-1
										106575572	sodium/potassium-transporting ATPase subunit alpha-1-like
										106612682	cytochrome c oxidase subunit 7A2, mitochondrial-like
Head kidney	UP	Molecular function	GO:0015293	symporter activity	14/721	72/16726	1.9759e-06	4.74216e-05	3.45262e-05	106567993	sodium- and chloride-dependent GABA transporter ine-like
										106566494	solute carrier family 6 member 8
										106567643	sodium- and chloride-dependent GABA transporter 2-like
										106581333	sodium- and chloride-dependent GABA transporter 2-like
										100196793	solute carrier family 6 member 19
										106561167	sodium/nucleoside cotransporter 2-like
										106575953	sodium- and chloride-dependent GABA transporter 2-like
										106565344	sodium- and chloride-dependent GABA transporter 2-like
										106608636	excitatory amino acid transporter 3-like
										106570711	sodium-dependent neutral amino acid transporter B(0)AT1-like
										106567422	solute carrier family 23 member 1-like
										106570712	sodium-dependent neutral amino acid transporter B(0)AT3-like
										106588989	sodium- and chloride-dependent GABA transporter 1-like
										106560848	solute carrier family 12 member 3-like
Head kidney	UP	Molecular function	GO:0022804	active transmembrane transporter activity	29/721	267/16726	4.74214e-06	0.000106698	7.76837e-05	106567993	sodium- and chloride-dependent GABA transporter ine-like
										106566494	solute carrier family 6 member 8
										106567643	sodium- and chloride-dependent GABA transporter 2-like
										106581333	sodium- and chloride-dependent GABA transporter 2-like
										100196793	solute carrier family 6 member 19
										106561167	sodium/nucleoside cotransporter 2-like
										106563502	sulfate transporter-like
										106576843	ATP binding cassette subfamily C member 2
										106601647	band 3 anion exchange protein-like
										106575953	sodium- and chloride-dependent GABA transporter 2-like
										106603691	sodium/calcium exchanger 2-like
										106581173	multidrug and toxin extrusion protein 1-like
										106574544	multidrug resistance-associated protein 4-like
										106565344	sodium- and chloride-dependent GABA transporter 2-like
										100195195	Sodium-dependent phosphate transporter 1-A
										106608636	excitatory amino acid transporter 3-like
										106563433	extensin-1-like
										100380357	Sulfate transporter
										106570711	sodium-dependent neutral amino acid transporter B(0)AT1-like
										106612938	multidrug and toxin extrusion protein 1-like
										106567422	solute carrier family 23 member 1-like
										106566781	solute carrier family 26 member 6-like
										106606869	band 3 anion exchange protein-like
										106570712	sodium-dependent neutral amino acid transporter B(0)AT3-like
										106588989	sodium- and chloride-dependent GABA transporter 1-like
										106560848	solute carrier family 12 member 3-like
										106583044	sodium/hydrogen exchanger 3-like
										100136390	sodium/potassium-transporting ATPase subunit alpha-1
										106575572	sodium/potassium-transporting ATPase subunit alpha-1-like
Head kidney	UP	Molecular function	GO:0005328	neurotransmitter:sodium symporter activity	10/721	44/16726	1.36369e-05	0.000288782	0.000210254	106567993	sodium- and chloride-dependent GABA transporter ine-like
										106566494	solute carrier family 6 member 8
										106567643	sodium- and chloride-dependent GABA transporter 2-like
										106581333	sodium- and chloride-dependent GABA transporter 2-like
										100196793	solute carrier family 6 member 19
										106575953	sodium- and chloride-dependent GABA transporter 2-like
										106565344	sodium- and chloride-dependent GABA transporter 2-like
										106570711	sodium-dependent neutral amino acid transporter B(0)AT1-like
										106570712	sodium-dependent neutral amino acid transporter B(0)AT3-like
										106588989	sodium- and chloride-dependent GABA transporter 1-like
Head kidney	UP	Molecular function	GO:0008483	transaminase activity	9/721	36/16726	1.61349e-05	0.000322699	0.000234947	106608869	ornithine aminotransferase, mitochondrial-like
										106604909	glutamine--fructose-6-phosphate aminotransferase [isomerizing] 2-like
										106600424	alanine aminotransferase 2-like
										106564456	4-aminobutyrate aminotransferase, mitochondrial-like
										106573756	aspartate aminotransferase, mitochondrial-like
										106560421	alanine aminotransferase 2-like
										106577459	ethanolamine-phosphate phospho-lyase-like
										106576140	branched-chain-amino-acid aminotransferase, cytosolic-like
										106568771	alanine-glyoxylate aminotransferase
Head kidney	UP	Molecular function	GO:0016769	transferase activity, transferring nitrogenous groups	9/721	37/16726	2.05123e-05	0.000388655	0.000282968	106608869	ornithine aminotransferase, mitochondrial-like
										106604909	glutamine--fructose-6-phosphate aminotransferase [isomerizing] 2-like
										106600424	alanine aminotransferase 2-like
										106564456	4-aminobutyrate aminotransferase, mitochondrial-like
										106573756	aspartate aminotransferase, mitochondrial-like
										106560421	alanine aminotransferase 2-like
										106577459	ethanolamine-phosphate phospho-lyase-like
										106576140	branched-chain-amino-acid aminotransferase, cytosolic-like
										106568771	alanine-glyoxylate aminotransferase
Head kidney	UP	Molecular function	GO:0005179	hormone activity	8/721	29/16726	2.19789e-05	0.00039562	0.000288039	106585200	growth hormone receptor-like
										106584669	ADM-like
										106584617	calcitonin-1-like
										106561247	adrenomedullin 2
										106609361	ADM2-like
										106563064	stanniocalcin-like
										106567368	C-type natriuretic peptide 3-like
										106567951	stanniocalcin
Head kidney	UP	Molecular function	GO:0005326	neurotransmitter transporter activity	10/721	47/16726	2.53171e-05	0.000434008	0.000315988	106567993	sodium- and chloride-dependent GABA transporter ine-like
										106566494	solute carrier family 6 member 8
										106567643	sodium- and chloride-dependent GABA transporter 2-like
										106581333	sodium- and chloride-dependent GABA transporter 2-like
										100196793	solute carrier family 6 member 19
										106575953	sodium- and chloride-dependent GABA transporter 2-like
										106565344	sodium- and chloride-dependent GABA transporter 2-like
										106570711	sodium-dependent neutral amino acid transporter B(0)AT1-like
										106570712	sodium-dependent neutral amino acid transporter B(0)AT3-like
										106588989	sodium- and chloride-dependent GABA transporter 1-like
Head kidney	UP	Molecular function	GO:0050662	coenzyme binding	27/721	266/16726	3.38916e-05	0.000549726	0.000400239	106608869	ornithine aminotransferase, mitochondrial-like
										106561658	probable 2-oxoglutarate dehydrogenase E1 component DHKTD1, mitochondrial
										100196697	isovaleryl Coenzyme A dehydrogenase
										106600424	alanine aminotransferase 2-like
										106564456	4-aminobutyrate aminotransferase, mitochondrial-like
										100194819	acyl-CoA dehydrogenase family member 11
										106560235	delta(24)-sterol reductase-like
										106573756	aspartate aminotransferase, mitochondrial-like
										106566120	serine hydroxymethyltransferase 2
										106613967	dimethylaniline monooxygenase [N-oxide-forming] 5-like
										100380763	xanthine dehydrogenase
										106574430	acyl-CoA-binding protein-like
										106572705	glucose-6-phosphate 1-dehydrogenase-like
										106577060	prolyl 4-hydroxylase subunit alpha-1-like
										106586750	NADP-dependent malic enzyme, mitochondrial-like
										106560421	alanine aminotransferase 2-like
										106575269	acyl-CoA-binding protein-like
										100196048	Hydroxyacid oxidase 2
										106576798	kynurenine 3-monooxygenase-like
										100194964	Cystathionine gamma-lyase
										106561367	NADH dehydrogenase [ubiquinone] 1 alpha subcomplex subunit 9, mitochondrial-like
										106577459	ethanolamine-phosphate phospho-lyase-like
										100194766	flavin containing monooxygenase 5
										106601062	L-serine dehydratase/L-threonine deaminase-like
										100196746	hydroxyacid oxidase 1
										106572153	5'-aminolevulinate synthase 2
										106580394	L-serine dehydratase/L-threonine deaminase-like
Head kidney	UP	Molecular function	GO:0015267	channel activity	25/721	238/16726	3.72254e-05	0.000549726	0.000400239	106604681	neuronal acetylcholine receptor subunit alpha-7-like
										106613163	inward rectifier potassium channel 13-like
										106568452	trimeric intracellular cation channel type B-like
										106606915	potassium voltage-gated channel subfamily KQT member 5-like
										106611786	neuronal acetylcholine receptor subunit alpha-7-like
										100195745	Potassium channel subfamily K member 15
										106571968	piezo-type mechanosensitive ion channel component 2-like
										106568987	volume-regulated anion channel subunit LRRC8D-like
										106602061	inward rectifier potassium channel 16-like
										106606396	inward rectifier potassium channel 16-like
										106574544	multidrug resistance-associated protein 4-like
										106564502	volume-regulated anion channel subunit LRRC8C-like
										106580069	transient receptor potential cation channel subfamily M member 7-like
										106560446	mucolipin-3-like
										100195531	chloride intracellular channel 2
										106567683	ATP-sensitive inward rectifier potassium channel 15-like
										106569327	aquaporin FA-CHIP-like
										106576934	voltage-dependent calcium channel gamma-6 subunit-like
										106567580	glutamate receptor 4
										106568959	small conductance calcium-activated potassium channel protein 2-like
										106586588	transmembrane protein 37
										106603448	ATP-sensitive inward rectifier potassium channel 15-like
										106607311	cytolysin RTX-A-like
										106566861	chloride channel protein ClC-Kb-like
										106600435	aquaporin FA-CHIP-like
Head kidney	UP	Molecular function	GO:0022803	passive transmembrane transporter activity	25/721	238/16726	3.72254e-05	0.000549726	0.000400239	106604681	neuronal acetylcholine receptor subunit alpha-7-like
										106613163	inward rectifier potassium channel 13-like
										106568452	trimeric intracellular cation channel type B-like
										106606915	potassium voltage-gated channel subfamily KQT member 5-like
										106611786	neuronal acetylcholine receptor subunit alpha-7-like
										100195745	Potassium channel subfamily K member 15
										106571968	piezo-type mechanosensitive ion channel component 2-like
										106568987	volume-regulated anion channel subunit LRRC8D-like
										106602061	inward rectifier potassium channel 16-like
										106606396	inward rectifier potassium channel 16-like
										106574544	multidrug resistance-associated protein 4-like
										106564502	volume-regulated anion channel subunit LRRC8C-like
										106580069	transient receptor potential cation channel subfamily M member 7-like
										106560446	mucolipin-3-like
										100195531	chloride intracellular channel 2
										106567683	ATP-sensitive inward rectifier potassium channel 15-like
										106569327	aquaporin FA-CHIP-like
										106576934	voltage-dependent calcium channel gamma-6 subunit-like
										106567580	glutamate receptor 4
										106568959	small conductance calcium-activated potassium channel protein 2-like
										106586588	transmembrane protein 37
										106603448	ATP-sensitive inward rectifier potassium channel 15-like
										106607311	cytolysin RTX-A-like
										106566861	chloride channel protein ClC-Kb-like
										106600435	aquaporin FA-CHIP-like
Head kidney	UP	Molecular function	GO:0046873	metal ion transmembrane transporter activity	26/721	253/16726	3.81754e-05	0.000549726	0.000400239	106567993	sodium- and chloride-dependent GABA transporter ine-like
										106566494	solute carrier family 6 member 8
										106613163	inward rectifier potassium channel 13-like
										106567643	sodium- and chloride-dependent GABA transporter 2-like
										106581333	sodium- and chloride-dependent GABA transporter 2-like
										100196793	solute carrier family 6 member 19
										106561167	sodium/nucleoside cotransporter 2-like
										106606915	potassium voltage-gated channel subfamily KQT member 5-like
										100195745	Potassium channel subfamily K member 15
										106575953	sodium- and chloride-dependent GABA transporter 2-like
										106603691	sodium/calcium exchanger 2-like
										106602061	inward rectifier potassium channel 16-like
										106606396	inward rectifier potassium channel 16-like
										106565344	sodium- and chloride-dependent GABA transporter 2-like
										106567683	ATP-sensitive inward rectifier potassium channel 15-like
										106570711	sodium-dependent neutral amino acid transporter B(0)AT1-like
										106567422	solute carrier family 23 member 1-like
										106576934	voltage-dependent calcium channel gamma-6 subunit-like
										106568959	small conductance calcium-activated potassium channel protein 2-like
										106586588	transmembrane protein 37
										106570712	sodium-dependent neutral amino acid transporter B(0)AT3-like
										106588989	sodium- and chloride-dependent GABA transporter 1-like
										106603448	ATP-sensitive inward rectifier potassium channel 15-like
										106583044	sodium/hydrogen exchanger 3-like
										100136390	sodium/potassium-transporting ATPase subunit alpha-1
										106575572	sodium/potassium-transporting ATPase subunit alpha-1-like
Head kidney	UP	Molecular function	GO:0030170	pyridoxal phosphate binding	11/721	64/16726	8.15705e-05	0.00108761	0.000791854	106608869	ornithine aminotransferase, mitochondrial-like
										106600424	alanine aminotransferase 2-like
										106564456	4-aminobutyrate aminotransferase, mitochondrial-like
										106573756	aspartate aminotransferase, mitochondrial-like
										106566120	serine hydroxymethyltransferase 2
										106560421	alanine aminotransferase 2-like
										100194964	Cystathionine gamma-lyase
										106577459	ethanolamine-phosphate phospho-lyase-like
										106601062	L-serine dehydratase/L-threonine deaminase-like
										106572153	5'-aminolevulinate synthase 2
										106580394	L-serine dehydratase/L-threonine deaminase-like
Head kidney	UP	Molecular function	GO:0070279	vitamin B6 binding	11/721	64/16726	8.15705e-05	0.00108761	0.000791854	106608869	ornithine aminotransferase, mitochondrial-like
										106600424	alanine aminotransferase 2-like
										106564456	4-aminobutyrate aminotransferase, mitochondrial-like
										106573756	aspartate aminotransferase, mitochondrial-like
										106566120	serine hydroxymethyltransferase 2
										106560421	alanine aminotransferase 2-like
										100194964	Cystathionine gamma-lyase
										106577459	ethanolamine-phosphate phospho-lyase-like
										106601062	L-serine dehydratase/L-threonine deaminase-like
										106572153	5'-aminolevulinate synthase 2
										106580394	L-serine dehydratase/L-threonine deaminase-like
Head kidney	UP	Molecular function	GO:0019842	vitamin binding	15/721	112/16726	9.15389e-05	0.00117693	0.000856887	106608869	ornithine aminotransferase, mitochondrial-like
										106561658	probable 2-oxoglutarate dehydrogenase E1 component DHKTD1, mitochondrial
										106600424	alanine aminotransferase 2-like
										106564456	4-aminobutyrate aminotransferase, mitochondrial-like
										106573756	aspartate aminotransferase, mitochondrial-like
										106566120	serine hydroxymethyltransferase 2
										106578409	thiamin pyrophosphokinase 1
										106577060	prolyl 4-hydroxylase subunit alpha-1-like
										106560421	alanine aminotransferase 2-like
										100194964	Cystathionine gamma-lyase
										100306782	formimidoyltransferase cyclodeaminase
										106577459	ethanolamine-phosphate phospho-lyase-like
										106601062	L-serine dehydratase/L-threonine deaminase-like
										106572153	5'-aminolevulinate synthase 2
										106580394	L-serine dehydratase/L-threonine deaminase-like
Head kidney	UP	Molecular function	GO:0016705	oxidoreductase activity, acting on paired donors, with incorporation or reduction of molecular oxygen	17/721	139/16726	0.000101636	0.00126169	0.0009186	106571110	cholesterol 24-hydroxylase-like
										106586421	sterol 26-hydroxylase, mitochondrial-like
										106570209	lanosterol 14-alpha demethylase-like
										106576803	cytochrome P450 1B1-like
										106569335	5-beta-cholestane-3-alpha,7-alpha-diol 12-alpha-hydroxylase-like
										106613967	dimethylaniline monooxygenase [N-oxide-forming] 5-like
										106602559	cytochrome P450 4V2-like
										106580756	cytochrome P450 2M1
										106573203	cytochrome P450 2F2-like
										106569008	cholesterol 7-alpha-monooxygenase-like
										106577060	prolyl 4-hydroxylase subunit alpha-1-like
										106608020	cytochrome P450 2K1-like
										106599889	5-beta-cholestane-3-alpha,7-alpha-diol 12-alpha-hydroxylase-like
										106576798	kynurenine 3-monooxygenase-like
										106603194	trimethyllysine dioxygenase, mitochondrial-like
										106599438	25-hydroxycholesterol 7-alpha-hydroxylase-like
										100194766	flavin containing monooxygenase 5
Head kidney	UP	Molecular function	GO:0038024	cargo receptor activity	10/721	58/16726	0.000166333	0.00199599	0.00145322	100136429	very low-density lipoprotein receptor
										106588366	ectonucleotide pyrophosphatase/phosphodiesterase family member 2-like
										100380852	ectonucleotide pyrophosphatase/phosphodiesterase family member 1
										106567922	transmembrane protease, serine 2
										106611251	HHIP-like protein 1
										100195190	Transmembrane protease, serine 2
										100380355	HHIP-like protein 1
										106560709	lysosome membrane protein 2-like
										106607810	scavenger receptor class A member 5-like
										106570803	sushi domain-containing protein 2-like
Head kidney	UP	Molecular function	GO:0005044	scavenger receptor activity	9/721	51/16726	0.000292436	0.00339603	0.00247255	106588366	ectonucleotide pyrophosphatase/phosphodiesterase family member 2-like
										100380852	ectonucleotide pyrophosphatase/phosphodiesterase family member 1
										106567922	transmembrane protease, serine 2
										106611251	HHIP-like protein 1
										100195190	Transmembrane protease, serine 2
										100380355	HHIP-like protein 1
										106560709	lysosome membrane protein 2-like
										106607810	scavenger receptor class A member 5-like
										106570803	sushi domain-containing protein 2-like
Head kidney	UP	Molecular function	GO:0005242	inward rectifier potassium channel activity	5/721	15/16726	0.000307209	0.0034561	0.00251628	106613163	inward rectifier potassium channel 13-like
										106602061	inward rectifier potassium channel 16-like
										106606396	inward rectifier potassium channel 16-like
										106567683	ATP-sensitive inward rectifier potassium channel 15-like
										106603448	ATP-sensitive inward rectifier potassium channel 15-like
Head kidney	UP	Molecular function	GO:0008238	exopeptidase activity	14/721	114/16726	0.000389481	0.00424888	0.00309348	106612847	carboxypeptidase D-like
										106575829	angiotensin-converting enzyme 2-like
										106560235	delta(24)-sterol reductase-like
										106568230	gamma-glutamyltranspeptidase 1-like
										106572400	probable carboxypeptidase PM20D1.2
										100194811	Collectrin
										100195220	gamma-glutamyltransferase 1
										106610934	glutamyl aminopeptidase-like
										106573055	methionine aminopeptidase 2-like
										106611530	X-prolyl aminopeptidase 2
										106585500	gamma-glutamyltransferase 5-like
										106560810	aminopeptidase N-like
										100196692	Beta-Ala-His dipeptidase
										106574087	carboxypeptidase N subunit 2-like
Head kidney	UP	Molecular function	GO:0005216	ion channel activity	21/721	216/16726	0.000440299	0.00466199	0.00339425	106604681	neuronal acetylcholine receptor subunit alpha-7-like
										106613163	inward rectifier potassium channel 13-like
										106568452	trimeric intracellular cation channel type B-like
										106606915	potassium voltage-gated channel subfamily KQT member 5-like
										106611786	neuronal acetylcholine receptor subunit alpha-7-like
										100195745	Potassium channel subfamily K member 15
										106568987	volume-regulated anion channel subunit LRRC8D-like
										106602061	inward rectifier potassium channel 16-like
										106606396	inward rectifier potassium channel 16-like
										106574544	multidrug resistance-associated protein 4-like
										106564502	volume-regulated anion channel subunit LRRC8C-like
										106580069	transient receptor potential cation channel subfamily M member 7-like
										106560446	mucolipin-3-like
										100195531	chloride intracellular channel 2
										106567683	ATP-sensitive inward rectifier potassium channel 15-like
										106576934	voltage-dependent calcium channel gamma-6 subunit-like
										106567580	glutamate receptor 4
										106568959	small conductance calcium-activated potassium channel protein 2-like
										106586588	transmembrane protein 37
										106603448	ATP-sensitive inward rectifier potassium channel 15-like
										106566861	chloride channel protein ClC-Kb-like
Head kidney	UP	Molecular function	GO:0022838	substrate-specific channel activity	21/721	217/16726	0.000468246	0.00481624	0.00350656	106604681	neuronal acetylcholine receptor subunit alpha-7-like
										106613163	inward rectifier potassium channel 13-like
										106568452	trimeric intracellular cation channel type B-like
										106606915	potassium voltage-gated channel subfamily KQT member 5-like
										106611786	neuronal acetylcholine receptor subunit alpha-7-like
										100195745	Potassium channel subfamily K member 15
										106568987	volume-regulated anion channel subunit LRRC8D-like
										106602061	inward rectifier potassium channel 16-like
										106606396	inward rectifier potassium channel 16-like
										106574544	multidrug resistance-associated protein 4-like
										106564502	volume-regulated anion channel subunit LRRC8C-like
										106580069	transient receptor potential cation channel subfamily M member 7-like
										106560446	mucolipin-3-like
										100195531	chloride intracellular channel 2
										106567683	ATP-sensitive inward rectifier potassium channel 15-like
										106576934	voltage-dependent calcium channel gamma-6 subunit-like
										106567580	glutamate receptor 4
										106568959	small conductance calcium-activated potassium channel protein 2-like
										106586588	transmembrane protein 37
										106603448	ATP-sensitive inward rectifier potassium channel 15-like
										106566861	chloride channel protein ClC-Kb-like
Head kidney	UP	Molecular function	GO:0004252	serine-type endopeptidase activity	13/721	107/16726	0.000689364	0.00671327	0.00488773	106575728	coagulation factor VII-like
										106567922	transmembrane protease, serine 2
										106572575	trypsin I-P1-like
										106607527	serine protease HTRA1A-like
										100380442	Coagulation factor IX
										106561958	prothrombin-like
										106613383	suppression of tumorigenicity 14
										100195190	Transmembrane protease, serine 2
										106563416	suppressor of tumorigenicity 14 protein-like
										106577095	transmembrane protease serine 9-like
										106575296	dipeptidyl peptidase 4-like
										106577909	serine protease HTRA3-like
										106585134	serine protease HTRA1-like
Head kidney	UP	Molecular function	GO:0019825	oxygen binding	6/721	26/16726	0.000689975	0.00671327	0.00488773	106571832	androglobin
										106601402	cytoglobin-2-like
										100380379	neuroglobin
										106601078	hemoglobin subunit alpha-like
										106601073	hemoglobin subunit beta-1-like
										101448011	Hemoglobin subunit beta-1
Head kidney	UP	Molecular function	GO:0008509	anion transmembrane transporter activity	15/721	137/16726	0.000838775	0.00794629	0.00578546	100196793	solute carrier family 6 member 19
										106563502	sulfate transporter-like
										106576843	ATP binding cassette subfamily C member 2
										106601647	band 3 anion exchange protein-like
										106568987	volume-regulated anion channel subunit LRRC8D-like
										106574544	multidrug resistance-associated protein 4-like
										106564502	volume-regulated anion channel subunit LRRC8C-like
										100195531	chloride intracellular channel 2
										100380357	Sulfate transporter
										106567422	solute carrier family 23 member 1-like
										106566781	solute carrier family 26 member 6-like
										106606869	band 3 anion exchange protein-like
										106588229	riboflavin transporter 2-like
										106560848	solute carrier family 12 member 3-like
										106566861	chloride channel protein ClC-Kb-like
Head kidney	UP	Molecular function	GO:0004089	carbonate dehydratase activity	4/721	11/16726	0.000886301	0.00797671	0.0058076	106599341	carbonic anhydrase-like
										100195268	carbonic anhydrase
										106571618	carbonic anhydrase 14-like
										106612801	carbonic anhydrase 4-like
Head kidney	UP	Molecular function	GO:0016813	hydrolase activity, acting on carbon-nitrogen (but not peptide) bonds, in linear amidines	4/721	11/16726	0.000886301	0.00797671	0.0058076	106584046	N(G),N(G)-dimethylarginine dimethylaminohydrolase 1-like
										100196287	Arginase-1
										106572552	agmatinase
										106571621	allantoicase
Head kidney	UP	Molecular function	GO:0005261	cation channel activity	15/721	142/16726	0.00121291	0.0106499	0.00775389	106604681	neuronal acetylcholine receptor subunit alpha-7-like
										106613163	inward rectifier potassium channel 13-like
										106568452	trimeric intracellular cation channel type B-like
										106606915	potassium voltage-gated channel subfamily KQT member 5-like
										106611786	neuronal acetylcholine receptor subunit alpha-7-like
										100195745	Potassium channel subfamily K member 15
										106602061	inward rectifier potassium channel 16-like
										106606396	inward rectifier potassium channel 16-like
										106580069	transient receptor potential cation channel subfamily M member 7-like
										106560446	mucolipin-3-like
										106567683	ATP-sensitive inward rectifier potassium channel 15-like
										106576934	voltage-dependent calcium channel gamma-6 subunit-like
										106568959	small conductance calcium-activated potassium channel protein 2-like
										106586588	transmembrane protein 37
										106603448	ATP-sensitive inward rectifier potassium channel 15-like
Head kidney	UP	Molecular function	GO:0016810	hydrolase activity, acting on carbon-nitrogen (but not peptide) bonds	13/721	114/16726	0.00125279	0.0107382	0.00781815	100194932	aminoacylase 1
										106584046	N(G),N(G)-dimethylarginine dimethylaminohydrolase 1-like
										106583705	glutaminase kidney isoform, mitochondrial-like
										100195695	HIU hydrolase
										100196287	Arginase-1
										106570600	biotinidase-like
										106572552	agmatinase
										106571621	allantoicase
										106576984	isoaspartyl peptidase/L-asparaginase-like
										100380817	dihydropyrimidinase
										106609451	amidohydrolase domain containing 1
										100194544	aspartoacylase (aminocyclase) 3
										100286653	Cytidine deaminase
Head kidney	UP	Molecular function	GO:0016709	oxidoreductase activity, acting on paired donors, with incorporation or reduction of molecular oxygen, NAD(P)H as one donor, and incorporation of one atom of oxygen	5/721	20/16726	0.00132566	0.0110986	0.00808055	106571110	cholesterol 24-hydroxylase-like
										106613967	dimethylaniline monooxygenase [N-oxide-forming] 5-like
										106569008	cholesterol 7-alpha-monooxygenase-like
										106576798	kynurenine 3-monooxygenase-like
										100194766	flavin containing monooxygenase 5
Head kidney	UP	Molecular function	GO:0008237	metallopeptidase activity	18/721	193/16726	0.00175886	0.0143907	0.0104774	106612847	carboxypeptidase D-like
										106569443	matrix metalloproteinase-14-like
										100194932	aminoacylase 1
										106575829	angiotensin-converting enzyme 2-like
										106560235	delta(24)-sterol reductase-like
										106572400	probable carboxypeptidase PM20D1.2
										106585127	zinc metalloproteinase-disintegrin-like lachestatin-2
										106565443	matrix metalloproteinase-19-like
										106605695	meprin A subunit beta-like
										100194811	Collectrin
										106571837	ADAM metallopeptidase with thrombospondin type 1 motif 19
										106610934	glutamyl aminopeptidase-like
										106573055	methionine aminopeptidase 2-like
										106611530	X-prolyl aminopeptidase 2
										106560810	aminopeptidase N-like
										106612419	endothelin-converting enzyme 2-like
										106585459	stromelysin-3-like
										106579902	ADAM metallopeptidase with thrombospondin type 1 motif 13
Head kidney	UP	Molecular function	GO:0015297	antiporter activity	6/721	31/16726	0.00183691	0.0146953	0.0106992	106563502	sulfate transporter-like
										106603691	sodium/calcium exchanger 2-like
										106581173	multidrug and toxin extrusion protein 1-like
										100380357	Sulfate transporter
										106612938	multidrug and toxin extrusion protein 1-like
										106583044	sodium/hydrogen exchanger 3-like
Head kidney	UP	Molecular function	GO:0001871	pattern binding	4/721	14/16726	0.00242421	0.0185684	0.0135191	106588366	ectonucleotide pyrophosphatase/phosphodiesterase family member 2-like
										100380852	ectonucleotide pyrophosphatase/phosphodiesterase family member 1
										106570803	sushi domain-containing protein 2-like
										100137090	serum lectin 2
Head kidney	UP	Molecular function	GO:0030247	polysaccharide binding	4/721	14/16726	0.00242421	0.0185684	0.0135191	106588366	ectonucleotide pyrophosphatase/phosphodiesterase family member 2-like
										100380852	ectonucleotide pyrophosphatase/phosphodiesterase family member 1
										106570803	sushi domain-containing protein 2-like
										100137090	serum lectin 2
Head kidney	UP	Molecular function	GO:0016298	lipase activity	9/721	69/16726	0.0027367	0.0205253	0.0149438	106588366	ectonucleotide pyrophosphatase/phosphodiesterase family member 2-like
										106585533	sphingomyelin phosphodiesterase 4-like
										106575211	1-phosphatidylinositol 4,5-bisphosphate phosphodiesterase delta-4-like
										100194972	monoglyceride lipase
										106577823	cytosolic phospholipase A2 gamma-like
										106569629	lipoprotein lipase-like
										106574281	1-phosphatidylinositol 4,5-bisphosphate phosphodiesterase delta-4-like
										106573546	lipoprotein lipase-like
										106613695	lipoprotein lipase-like
Head kidney	UP	Molecular function	GO:0008236	serine-type peptidase activity	14/721	140/16726	0.0029109	0.0209585	0.0152592	106612847	carboxypeptidase D-like
										106575728	coagulation factor VII-like
										106567922	transmembrane protease, serine 2
										106572575	trypsin I-P1-like
										106607527	serine protease HTRA1A-like
										100380442	Coagulation factor IX
										106561958	prothrombin-like
										106613383	suppression of tumorigenicity 14
										100195190	Transmembrane protease, serine 2
										106563416	suppressor of tumorigenicity 14 protein-like
										106577095	transmembrane protease serine 9-like
										106575296	dipeptidyl peptidase 4-like
										106577909	serine protease HTRA3-like
										106585134	serine protease HTRA1-like
Head kidney	UP	Molecular function	GO:0017171	serine hydrolase activity	14/721	140/16726	0.0029109	0.0209585	0.0152592	106612847	carboxypeptidase D-like
										106575728	coagulation factor VII-like
										106567922	transmembrane protease, serine 2
										106572575	trypsin I-P1-like
										106607527	serine protease HTRA1A-like
										100380442	Coagulation factor IX
										106561958	prothrombin-like
										106613383	suppression of tumorigenicity 14
										100195190	Transmembrane protease, serine 2
										106563416	suppressor of tumorigenicity 14 protein-like
										106577095	transmembrane protease serine 9-like
										106575296	dipeptidyl peptidase 4-like
										106577909	serine protease HTRA3-like
										106585134	serine protease HTRA1-like
Head kidney	UP	Molecular function	GO:0051015	actin filament binding	12/721	113/16726	0.00346112	0.0244314	0.0177878	106570414	alpha-catulin-like
										106574252	protein Shroom2-like
										100194509	tropomodulin 4 (muscle)
										106566959	espin-like
										106599102	nesprin-2-like
										106575447	plastin-3-like
										106612196	proteoglycan 4-like
										106571274	unconventional myosin-VI-like
										106580917	tropomodulin-4-like
										106613419	shroom family member 2
										106583268	advillin-like
										106607239	supervillin-like
Head kidney	UP	Molecular function	GO:0015103	inorganic anion transmembrane transporter activity	11/721	99/16726	0.00354561	0.0245465	0.0178716	106563502	sulfate transporter-like
										106601647	band 3 anion exchange protein-like
										106568987	volume-regulated anion channel subunit LRRC8D-like
										106574544	multidrug resistance-associated protein 4-like
										106564502	volume-regulated anion channel subunit LRRC8C-like
										100195531	chloride intracellular channel 2
										100380357	Sulfate transporter
										106566781	solute carrier family 26 member 6-like
										106606869	band 3 anion exchange protein-like
										106560848	solute carrier family 12 member 3-like
										106566861	chloride channel protein ClC-Kb-like
Head kidney	UP	Molecular function	GO:0099094	ligand-gated cation channel activity	7/721	47/16726	0.0037569	0.024879	0.0181136	106604681	neuronal acetylcholine receptor subunit alpha-7-like
										106613163	inward rectifier potassium channel 13-like
										106611786	neuronal acetylcholine receptor subunit alpha-7-like
										106602061	inward rectifier potassium channel 16-like
										106606396	inward rectifier potassium channel 16-like
										106567683	ATP-sensitive inward rectifier potassium channel 15-like
										106603448	ATP-sensitive inward rectifier potassium channel 15-like
Head kidney	UP	Molecular function	GO:0005344	oxygen carrier activity	5/721	25/16726	0.00380095	0.024879	0.0181136	106601402	cytoglobin-2-like
										100380379	neuroglobin
										106601078	hemoglobin subunit alpha-like
										106601073	hemoglobin subunit beta-1-like
										101448011	Hemoglobin subunit beta-1
Head kidney	UP	Molecular function	GO:0016684	oxidoreductase activity, acting on peroxide as acceptor	5/721	25/16726	0.00380095	0.024879	0.0181136	106584278	peroxiredoxin-6-like
										106604683	uncharacterized LOC106604683
										106586175	catalase-like
										106612297	glutathione peroxidase 3-like
										106564824	catalase-like
Head kidney	UP	Molecular function	GO:0015079	potassium ion transmembrane transporter activity	10/721	87/16726	0.00416842	0.026797	0.0195101	106613163	inward rectifier potassium channel 13-like
										106606915	potassium voltage-gated channel subfamily KQT member 5-like
										100195745	Potassium channel subfamily K member 15
										106602061	inward rectifier potassium channel 16-like
										106606396	inward rectifier potassium channel 16-like
										106567683	ATP-sensitive inward rectifier potassium channel 15-like
										106568959	small conductance calcium-activated potassium channel protein 2-like
										106603448	ATP-sensitive inward rectifier potassium channel 15-like
										100136390	sodium/potassium-transporting ATPase subunit alpha-1
										106575572	sodium/potassium-transporting ATPase subunit alpha-1-like
Head kidney	UP	Molecular function	GO:0022836	gated channel activity	15/721	162/16726	0.0043851	0.0276954	0.0201642	106604681	neuronal acetylcholine receptor subunit alpha-7-like
										106613163	inward rectifier potassium channel 13-like
										106606915	potassium voltage-gated channel subfamily KQT member 5-like
										106611786	neuronal acetylcholine receptor subunit alpha-7-like
										106571968	piezo-type mechanosensitive ion channel component 2-like
										106602061	inward rectifier potassium channel 16-like
										106606396	inward rectifier potassium channel 16-like
										100195531	chloride intracellular channel 2
										106567683	ATP-sensitive inward rectifier potassium channel 15-like
										106576934	voltage-dependent calcium channel gamma-6 subunit-like
										106567580	glutamate receptor 4
										106568959	small conductance calcium-activated potassium channel protein 2-like
										106586588	transmembrane protein 37
										106603448	ATP-sensitive inward rectifier potassium channel 15-like
										106566861	chloride channel protein ClC-Kb-like
Head kidney	UP	Molecular function	GO:0048018	receptor ligand activity	14/721	148/16726	0.00480779	0.0298414	0.0217267	106585200	growth hormone receptor-like
										106609463	fibroblast growth factor 23-like
										106584669	ADM-like
										106584617	calcitonin-1-like
										106561247	adrenomedullin 2
										106612106	transforming growth factor beta-2-like
										106609361	ADM2-like
										106604525	platelet derived growth factor C
										106563064	stanniocalcin-like
										106604935	C-X-C motif chemokine 14-like
										106567368	C-type natriuretic peptide 3-like
										106565101	uncharacterized LOC106565101
										106563358	C-C motif chemokine 19-like
										106567951	stanniocalcin
Head kidney	UP	Molecular function	GO:0030414	peptidase inhibitor activity	10/721	89/16726	0.00490762	0.0299448	0.0218019	106571141	kunitz-type protease inhibitor 1-like
										100196821	Metalloproteinase inhibitor 3
										106569365	complement C3-like
										106581278	serpin H1-like
										106575196	anosmin-1-like
										106561864	kunitz-type serine protease inhibitor Kunitz-1-like
										106610865	kunitz-type protease inhibitor 1-like
										106584200	leukocyte elastase inhibitor-like
										106612675	kunitz-type protease inhibitor 2-like
										106584419	C3 and PZP-like alpha-2-macroglobulin domain-containing protein 8
Head kidney	UP	Molecular function	GO:1901681	sulfur compound binding	7/721	50/16726	0.00533921	0.0307543	0.0223913	106561658	probable 2-oxoglutarate dehydrogenase E1 component DHKTD1, mitochondrial
										106577862	amyloid-like protein 1
										106574430	acyl-CoA-binding protein-like
										106578409	thiamin pyrophosphokinase 1
										106575269	acyl-CoA-binding protein-like
										106573546	lipoprotein lipase-like
										106613695	lipoprotein lipase-like
Head kidney	UP	Molecular function	GO:0030545	receptor regulator activity	14/721	150/16726	0.00541183	0.0307543	0.0223913	106585200	growth hormone receptor-like
										106609463	fibroblast growth factor 23-like
										106584669	ADM-like
										106584617	calcitonin-1-like
										106561247	adrenomedullin 2
										106612106	transforming growth factor beta-2-like
										106609361	ADM2-like
										106604525	platelet derived growth factor C
										106563064	stanniocalcin-like
										106604935	C-X-C motif chemokine 14-like
										106567368	C-type natriuretic peptide 3-like
										106565101	uncharacterized LOC106565101
										106563358	C-C motif chemokine 19-like
										106567951	stanniocalcin
Head kidney	UP	Molecular function	GO:0005267	potassium channel activity	8/721	63/16726	0.00546743	0.0307543	0.0223913	106613163	inward rectifier potassium channel 13-like
										106606915	potassium voltage-gated channel subfamily KQT member 5-like
										100195745	Potassium channel subfamily K member 15
										106602061	inward rectifier potassium channel 16-like
										106606396	inward rectifier potassium channel 16-like
										106567683	ATP-sensitive inward rectifier potassium channel 15-like
										106568959	small conductance calcium-activated potassium channel protein 2-like
										106603448	ATP-sensitive inward rectifier potassium channel 15-like
Head kidney	UP	Molecular function	GO:0015276	ligand-gated ion channel activity	8/721	63/16726	0.00546743	0.0307543	0.0223913	106604681	neuronal acetylcholine receptor subunit alpha-7-like
										106613163	inward rectifier potassium channel 13-like
										106611786	neuronal acetylcholine receptor subunit alpha-7-like
										106602061	inward rectifier potassium channel 16-like
										106606396	inward rectifier potassium channel 16-like
										106567683	ATP-sensitive inward rectifier potassium channel 15-like
										106567580	glutamate receptor 4
										106603448	ATP-sensitive inward rectifier potassium channel 15-like
Head kidney	UP	Molecular function	GO:0022834	ligand-gated channel activity	8/721	63/16726	0.00546743	0.0307543	0.0223913	106604681	neuronal acetylcholine receptor subunit alpha-7-like
										106613163	inward rectifier potassium channel 13-like
										106611786	neuronal acetylcholine receptor subunit alpha-7-like
										106602061	inward rectifier potassium channel 16-like
										106606396	inward rectifier potassium channel 16-like
										106567683	ATP-sensitive inward rectifier potassium channel 15-like
										106567580	glutamate receptor 4
										106603448	ATP-sensitive inward rectifier potassium channel 15-like
Head kidney	UP	Molecular function	GO:0004866	endopeptidase inhibitor activity	9/721	78/16726	0.00625752	0.0339631	0.0247275	106571141	kunitz-type protease inhibitor 1-like
										100196821	Metalloproteinase inhibitor 3
										106569365	complement C3-like
										106581278	serpin H1-like
										106561864	kunitz-type serine protease inhibitor Kunitz-1-like
										106610865	kunitz-type protease inhibitor 1-like
										106584200	leukocyte elastase inhibitor-like
										106612675	kunitz-type protease inhibitor 2-like
										106584419	C3 and PZP-like alpha-2-macroglobulin domain-containing protein 8
Head kidney	UP	Molecular function	GO:0061135	endopeptidase regulator activity	9/721	78/16726	0.00625752	0.0339631	0.0247275	106571141	kunitz-type protease inhibitor 1-like
										100196821	Metalloproteinase inhibitor 3
										106569365	complement C3-like
										106581278	serpin H1-like
										106561864	kunitz-type serine protease inhibitor Kunitz-1-like
										106610865	kunitz-type protease inhibitor 1-like
										106584200	leukocyte elastase inhibitor-like
										106612675	kunitz-type protease inhibitor 2-like
										106584419	C3 and PZP-like alpha-2-macroglobulin domain-containing protein 8
Head kidney	UP	Molecular function	GO:0016702	oxidoreductase activity, acting on single donors with incorporation of molecular oxygen, incorporation of two atoms of oxygen	5/721	28/16726	0.00632091	0.0339631	0.0247275	100196492	cysteine dioxygenase type 1
										106577060	prolyl 4-hydroxylase subunit alpha-1-like
										106610314	hydroperoxide isomerase ALOXE3-like
										106590602	homogentisate 1,2-dioxygenase
										100195397	4-hydroxyphenylpyruvate dioxygenase
Head kidney	UP	Molecular function	GO:0008514	organic anion transmembrane transporter activity	6/721	40/16726	0.00689919	0.0365251	0.0265929	100196793	solute carrier family 6 member 19
										106563502	sulfate transporter-like
										106576843	ATP binding cassette subfamily C member 2
										100380357	Sulfate transporter
										106567422	solute carrier family 23 member 1-like
										106588229	riboflavin transporter 2-like
Head kidney	UP	Molecular function	GO:0016701	oxidoreductase activity, acting on single donors with incorporation of molecular oxygen	5/721	29/16726	0.00737211	0.0384632	0.0280039	100196492	cysteine dioxygenase type 1
										106577060	prolyl 4-hydroxylase subunit alpha-1-like
										106610314	hydroperoxide isomerase ALOXE3-like
										106590602	homogentisate 1,2-dioxygenase
										100195397	4-hydroxyphenylpyruvate dioxygenase
Head kidney	UP	Molecular function	GO:0036374	glutathione hydrolase activity	3/721	10/16726	0.00762504	0.0392145	0.0285509	106568230	gamma-glutamyltranspeptidase 1-like
										100195220	gamma-glutamyltransferase 1
										106585500	gamma-glutamyltransferase 5-like
Head kidney	UP	Molecular function	GO:0022839	ion gated channel activity	14/721	157/16726	0.00802235	0.0406767	0.0296155	106604681	neuronal acetylcholine receptor subunit alpha-7-like
										106613163	inward rectifier potassium channel 13-like
										106606915	potassium voltage-gated channel subfamily KQT member 5-like
										106611786	neuronal acetylcholine receptor subunit alpha-7-like
										106602061	inward rectifier potassium channel 16-like
										106606396	inward rectifier potassium channel 16-like
										100195531	chloride intracellular channel 2
										106567683	ATP-sensitive inward rectifier potassium channel 15-like
										106576934	voltage-dependent calcium channel gamma-6 subunit-like
										106567580	glutamate receptor 4
										106568959	small conductance calcium-activated potassium channel protein 2-like
										106586588	transmembrane protein 37
										106603448	ATP-sensitive inward rectifier potassium channel 15-like
										106566861	chloride channel protein ClC-Kb-like
Head kidney	UP	Molecular function	GO:0015108	chloride transmembrane transporter activity	6/721	42/16726	0.00876976	0.0438488	0.031925	106563502	sulfate transporter-like
										106574544	multidrug resistance-associated protein 4-like
										100195531	chloride intracellular channel 2
										100380357	Sulfate transporter
										106560848	solute carrier family 12 member 3-like
										106566861	chloride channel protein ClC-Kb-like
Head kidney	UP	Molecular function	GO:0061134	peptidase regulator activity	10/721	97/16726	0.00894274	0.0441012	0.0321087	106571141	kunitz-type protease inhibitor 1-like
										100196821	Metalloproteinase inhibitor 3
										106569365	complement C3-like
										106581278	serpin H1-like
										106575196	anosmin-1-like
										106561864	kunitz-type serine protease inhibitor Kunitz-1-like
										106610865	kunitz-type protease inhibitor 1-like
										106584200	leukocyte elastase inhibitor-like
										106612675	kunitz-type protease inhibitor 2-like
										106584419	C3 and PZP-like alpha-2-macroglobulin domain-containing protein 8
Head kidney	UP	Molecular function	GO:0016840	carbon-nitrogen lyase activity	3/721	11/16726	0.0101521	0.0493884	0.0359583	100196396	Troponin C-akin-1 protein
										106561681	histidine ammonia-lyase
										106576224	histidine ammonia-lyase-like
Head kidney	DOWN	Biological process	GO:0007155	cell adhesion	12/74	323/10002	3.81116e-06	0.000695536	0.000645891	106610478	protocadherin-10-like
										106610834	thrombospondin-1-like
										100196001	Tumor necrosis factor-inducible protein TSG-6
										106587655	thrombospondin-1-like
										106579677	collagen alpha-1(XVIII) chain-like
										106560648	P-selectin-like
										106599404	tenascin R
										106579149	integrin beta-3-like
										106610486	protocadherin-10-like
										106602750	dachsous cadherin-related 2
										106575638	T-cell immunoreceptor with Ig and ITIM domains
										106563665	ependymin-like
Head kidney	DOWN	Biological process	GO:0022610	biological adhesion	12/74	323/10002	3.81116e-06	0.000695536	0.000645891	106610478	protocadherin-10-like
										106610834	thrombospondin-1-like
										100196001	Tumor necrosis factor-inducible protein TSG-6
										106587655	thrombospondin-1-like
										106579677	collagen alpha-1(XVIII) chain-like
										106560648	P-selectin-like
										106599404	tenascin R
										106579149	integrin beta-3-like
										106610486	protocadherin-10-like
										106602750	dachsous cadherin-related 2
										106575638	T-cell immunoreceptor with Ig and ITIM domains
										106563665	ependymin-like
Head kidney	DOWN	Biological process	GO:0006694	steroid biosynthetic process	4/74	18/10002	7.81021e-06	0.000950242	0.000882417	100136492	steroidogenic acute regulatory protein, mitochondrial
										106561846	cholesterol side-chain cleavage enzyme, mitochondrial
										106580600	steroidogenic acute regulatory protein, mitochondrial-like
										106580550	testosterone 17-beta-dehydrogenase 3-like
Head kidney	DOWN	Biological process	GO:0008202	steroid metabolic process	4/74	37/10002	0.000151565	0.0138303	0.0128432	100136492	steroidogenic acute regulatory protein, mitochondrial
										106561846	cholesterol side-chain cleavage enzyme, mitochondrial
										106580600	steroidogenic acute regulatory protein, mitochondrial-like
										106580550	testosterone 17-beta-dehydrogenase 3-like
Head kidney	DOWN	Biological process	GO:0007050	cell cycle arrest	3/74	16/10002	0.000203165	0.014831	0.0137724	106609100	cyclin-dependent kinase inhibitor 1B-like
										106575072	cyclin-dependent kinase inhibitor 1B-like
										106581827	protein reprimo A-like
Head kidney	DOWN	Biological process	GO:1901615	organic hydroxy compound metabolic process	5/74	83/10002	0.00035843	0.0218045	0.0202481	100136492	steroidogenic acute regulatory protein, mitochondrial
										106561846	cholesterol side-chain cleavage enzyme, mitochondrial
										106580600	steroidogenic acute regulatory protein, mitochondrial-like
										106580550	testosterone 17-beta-dehydrogenase 3-like
										106560700	tyrosine hydroxylase
Head kidney	DOWN	Biological process	GO:0008203	cholesterol metabolic process	3/74	24/10002	0.000703728	0.0362927	0.0337023	100136492	steroidogenic acute regulatory protein, mitochondrial
										106561846	cholesterol side-chain cleavage enzyme, mitochondrial
										106580600	steroidogenic acute regulatory protein, mitochondrial-like
Head kidney	DOWN	Biological process	GO:1902652	secondary alcohol metabolic process	3/74	25/10002	0.000795457	0.0362927	0.0337023	100136492	steroidogenic acute regulatory protein, mitochondrial
										106561846	cholesterol side-chain cleavage enzyme, mitochondrial
										106580600	steroidogenic acute regulatory protein, mitochondrial-like
Head kidney	DOWN	Biological process	GO:0048856	anatomical structure development	11/74	497/10002	0.000993721	0.0396443	0.0368146	106564629	glial fibrillary acidic protein-like
										106571373	gap junction alpha-1 protein
										106610834	thrombospondin-1-like
										106580550	testosterone 17-beta-dehydrogenase 3-like
										106587655	thrombospondin-1-like
										106607775	gap junction alpha-1 protein-like
										106599404	tenascin R
										106575638	T-cell immunoreceptor with Ig and ITIM domains
										106586722	nuclear receptor subfamily 0 group B member 1-like
										106587529	SRY-box 6
										100194479	homeobox protein HoxA4an
Head kidney	DOWN	Biological process	GO:0048731	system development	8/74	282/10002	0.00108615	0.0396443	0.0368146	106564629	glial fibrillary acidic protein-like
										106571373	gap junction alpha-1 protein
										106610834	thrombospondin-1-like
										106580550	testosterone 17-beta-dehydrogenase 3-like
										106587655	thrombospondin-1-like
										106607775	gap junction alpha-1 protein-like
										106599404	tenascin R
										106586722	nuclear receptor subfamily 0 group B member 1-like
Head kidney	DOWN	Biological process	GO:0016125	sterol metabolic process	3/74	29/10002	0.00123721	0.0410529	0.0381226	100136492	steroidogenic acute regulatory protein, mitochondrial
										106561846	cholesterol side-chain cleavage enzyme, mitochondrial
										106580600	steroidogenic acute regulatory protein, mitochondrial-like
Head kidney	DOWN	Biological process	GO:0007275	multicellular organism development	10/74	438/10002	0.00136046	0.0413806	0.038427	106564629	glial fibrillary acidic protein-like
										106571373	gap junction alpha-1 protein
										106610834	thrombospondin-1-like
										106580550	testosterone 17-beta-dehydrogenase 3-like
										106587655	thrombospondin-1-like
										106607775	gap junction alpha-1 protein-like
										106599404	tenascin R
										106586722	nuclear receptor subfamily 0 group B member 1-like
										106587529	SRY-box 6
										100194479	homeobox protein HoxA4an
Head kidney	DOWN	Biological process	GO:0072359	circulatory system development	4/74	68/10002	0.00157237	0.0441472	0.0409961	106571373	gap junction alpha-1 protein
										106610834	thrombospondin-1-like
										106587655	thrombospondin-1-like
										106607775	gap junction alpha-1 protein-like
Head kidney	DOWN	Cellular component	GO:0044421	extracellular region part	9/115	241/12100	0.000477615	0.0277017	0.0246349	106565354	saxiphilin-like
										106610834	thrombospondin-1-like
										106612541	A disintegrin and metalloproteinase with thrombospondin motifs 8-like
										106580931	A disintegrin and metalloproteinase with thrombospondin motifs 8-like
										106587655	thrombospondin-1-like
										106579677	collagen alpha-1(XVIII) chain-like
										106599404	tenascin R
										106568023	matrix metalloproteinase-28-like
										106608947	plasminogen activator inhibitor 1-like
Head kidney	DOWN	Cellular component	GO:0031012	extracellular matrix	5/115	81/12100	0.00102482	0.0297197	0.0264295	106612541	A disintegrin and metalloproteinase with thrombospondin motifs 8-like
										106580931	A disintegrin and metalloproteinase with thrombospondin motifs 8-like
										106579677	collagen alpha-1(XVIII) chain-like
										106599404	tenascin R
										106568023	matrix metalloproteinase-28-like
Head kidney	DOWN	Cellular component	GO:0062023	collagen-containing extracellular matrix	4/115	55/12100	0.00181809	0.0351498	0.0312584	106612541	A disintegrin and metalloproteinase with thrombospondin motifs 8-like
										106580931	A disintegrin and metalloproteinase with thrombospondin motifs 8-like
										106579677	collagen alpha-1(XVIII) chain-like
										106599404	tenascin R
Head kidney	DOWN	Cellular component	GO:0044459	plasma membrane part	10/115	373/12100	0.00289413	0.0419649	0.037319	106571373	gap junction alpha-1 protein
										106560989	potassium voltage-gated channel subfamily KQT member 1-like
										106573109	sodium-dependent neutral amino acid transporter B(0)AT2-like
										106583107	ephrin type-A receptor 8-like
										106607775	gap junction alpha-1 protein-like
										106579149	integrin beta-3-like
										106608508	fatty acid-binding protein, intestinal-like
										106566236	sodium- and chloride-dependent GABA transporter 1-like
										106579014	TNF receptor superfamily member 13B
										106566043	monocarboxylate transporter 1-like
Head kidney	DOWN	Molecular function	GO:0004930	G protein-coupled receptor activity	15/132	333/16726	5.87827e-08	1.08748e-05	8.9721e-06	106588456	C3a anaphylatoxin chemotactic receptor-like
										106572941	neuropeptides B/W receptor type 2-like
										106577486	cholecystokinin receptor type A-like
										100195489	C-C chemokine receptor type 9
										106606823	CD97 antigen-like
										106586024	prokineticin receptor 1-like
										106574553	2-oxoglutarate receptor 1-like
										106578085	chemokine-like receptor 1
										106613996	sphingosine 1-phosphate receptor 4-like
										106579839	G-protein coupled receptor 124-like
										106586769	parapinopsin-like
										106579010	somatostatin receptor 5
										106581491	P2Y purinoceptor 13-like
										106577691	probable G-protein coupled receptor 132
										100306754	C-X-C chemokine receptor type 4
Head kidney	DOWN	Molecular function	GO:0001653	peptide receptor activity	5/132	61/16726	0.00011844	0.0073038	0.00602589	106572941	neuropeptides B/W receptor type 2-like
										106577486	cholecystokinin receptor type A-like
										100195489	C-C chemokine receptor type 9
										106579010	somatostatin receptor 5
										100306754	C-X-C chemokine receptor type 4
Head kidney	DOWN	Molecular function	GO:0008528	G protein-coupled peptide receptor activity	5/132	61/16726	0.00011844	0.0073038	0.00602589	106572941	neuropeptides B/W receptor type 2-like
										106577486	cholecystokinin receptor type A-like
										100195489	C-C chemokine receptor type 9
										106579010	somatostatin receptor 5
										100306754	C-X-C chemokine receptor type 4
Head kidney	DOWN	Molecular function	GO:0016705	oxidoreductase activity, acting on paired donors, with incorporation or reduction of molecular oxygen	6/132	139/16726	0.000821604	0.0379992	0.0313507	106606086	steroid 21-hydroxylase
										106561846	cholesterol side-chain cleavage enzyme, mitochondrial
										100136945	testicular cytochrome P45011beta
										106612206	uncharacterized LOC106612206
										106590030	heme oxygenase-like
										106560700	tyrosine hydroxylase
Head kidney	DOWN	Molecular function	GO:0003707	steroid hormone receptor activity	5/132	98/16726	0.00107158	0.0396485	0.0327114	106585443	nuclear receptor subfamily 5 group A member 2-like
										106579988	nuclear receptor subfamily 5 group A member 2-like
										106582110	nuclear receptor subfamily 1 group D member 2-like
										106574458	nuclear receptor subfamily 4 group A member 3-like
[truncated: 1 more rows]
