# Supplementary material for: Host-Parasite Interaction of Atlantic salmon (Salmo salar) and the Ectoparasite Neoparamoeba perurans in Amoebic Gill Disease
Source: Front Immunol. 2021 May 31;12:672700. doi: 10.3389/fimmu.2021.672700 (PMC8202022; doi:10.3389/fimmu.2021.672700)
Supplement: Supplementary Table 7 — Enriched gene ontology (fold change > 2; P < 0.05) for the systemic response to amoebic gill disease in the spleen of Atlantic salmon affected by AGD in contrast to naïve fish. [Excel table]. [file Table_7.xlsx]

## Sheet: Sheet1
Supplementary Table 7. Enriched gene ontology (fold change > 2; P < 0.05) for the systemic response to amoebic gill disease in the spleen of Atlantic salmon affected by AGD in contrast to naïve fish.
Tissue/Condition	Regulation	Ontology	Gene Ontology ID	Description	GeneRatio	BgRatio	P-value	P-adjusted	Q-value	GeneID	Gene description
Spleen	UP	Biological process	GO:0042742	defense response to bacterium	2/11	16/9353	0.00014956	0.00627504	0.00302277	100136439	cathelicidin antimicrobial peptide
										100136365	lysozyme C II
Spleen	UP	Biological process	GO:0009617	response to bacterium	2/11	19/9353	0.000212713	0.00627504	0.00302277	100136439	cathelicidin antimicrobial peptide
										100136365	lysozyme C II
Spleen	UP	Biological process	GO:0098542	defense response to other organism	2/11	32/9353	0.000611866	0.00988964	0.00476397	100136439	cathelicidin antimicrobial peptide
										100136365	lysozyme C II
Spleen	UP	Biological process	GO:0009607	response to biotic stimulus	2/11	41/9353	0.00100573	0.00988964	0.00476397	100136439	cathelicidin antimicrobial peptide
										100136365	lysozyme C II
Spleen	UP	Biological process	GO:0043207	response to external biotic stimulus	2/11	41/9353	0.00100573	0.00988964	0.00476397	100136439	cathelicidin antimicrobial peptide
										100136365	lysozyme C II
Spleen	UP	Biological process	GO:0051707	response to other organism	2/11	41/9353	0.00100573	0.00988964	0.00476397	100136439	cathelicidin antimicrobial peptide
										100136365	lysozyme C II
Spleen	UP	Biological process	GO:0051704	multi-organism process	2/11	91/9353	0.00486388	0.0409956	0.0197481	100136439	cathelicidin antimicrobial peptide
										100136365	lysozyme C II
Spleen	UP	Molecular function	GO:0030246	carbohydrate binding	4/28	177/15569	0.000267103	0.0186972	0.0168697	106590259	sialic acid-binding Ig-like lectin 6
										100136447	C type lectin receptor B
										106602244	C-type lectin domain family 4 member M-like
										106611226	egl nine homolog 3-like
Spleen	Down	Biological process	GO:0043547	positive regulation of GTPase activity	3/48	11/9353	2.03e-05	0.00267824	0.00236611	106561770	ras-GEF domain-containing family member 1B-B-like
										106607670	T-cell lymphoma invasion and metastasis 2
										106568392	ras-GEF domain-containing family member 1B-B-like
Spleen	Down	Biological process	GO:0043085	positive regulation of catalytic activity	4/48	36/9353	3.19e-05	0.00267824	0.00236611	106561770	ras-GEF domain-containing family member 1B-B-like
										106613792	SHC-transforming protein 2-like
										106607670	T-cell lymphoma invasion and metastasis 2
										106568392	ras-GEF domain-containing family member 1B-B-like
Spleen	Down	Biological process	GO:0051345	positive regulation of hydrolase activity	3/48	15/9353	5.53e-05	0.00309566	0.00273489	106561770	ras-GEF domain-containing family member 1B-B-like
										106607670	T-cell lymphoma invasion and metastasis 2
										106568392	ras-GEF domain-containing family member 1B-B-like
Spleen	Down	Biological process	GO:0044093	positive regulation of molecular function	4/48	61/9353	0.000257124	0.0107992	0.00954064	106561770	ras-GEF domain-containing family member 1B-B-like
										106613792	SHC-transforming protein 2-like
										106607670	T-cell lymphoma invasion and metastasis 2
										106568392	ras-GEF domain-containing family member 1B-B-like
Spleen	Down	Biological process	GO:0043087	regulation of GTPase activity	3/48	35/9353	0.000739881	0.02486	0.0219628	106561770	ras-GEF domain-containing family member 1B-B-like
										106607670	T-cell lymphoma invasion and metastasis 2
										106568392	ras-GEF domain-containing family member 1B-B-like
Spleen	Down	Biological process	GO:0048384	retinoic acid receptor signaling pathway	2/48	11/9353	0.00137729	0.038564	0.0340697	106583303	nuclear receptor subfamily 1 group D member 1-like
										106565463	nuclear receptor subfamily 1 group D member 1-like
Spleen	Down	Biological process	GO:0007050	cell cycle arrest	2/48	13/9353	0.00194049	0.0407503	0.0360012	106575072	cyclin-dependent kinase inhibitor 1B-like
										106609100	cyclin-dependent kinase inhibitor 1B-like
Spleen	Down	Biological process	GO:0030522	intracellular receptor signaling pathway	2/48	13/9353	0.00194049	0.0407503	0.0360012	106583303	nuclear receptor subfamily 1 group D member 1-like
										106565463	nuclear receptor subfamily 1 group D member 1-like
Spleen	Down	Biological process	GO:0050790	regulation of catalytic activity	4/48	109/9353	0.00228964	0.04274	0.037759	106561770	ras-GEF domain-containing family member 1B-B-like
										106613792	SHC-transforming protein 2-like
										106607670	T-cell lymphoma invasion and metastasis 2
										106568392	ras-GEF domain-containing family member 1B-B-like
Spleen	Down	Biological process	GO:0007219	Notch signaling pathway	3/48	54/9353	0.00261899	0.043999	0.0388713	106589077	delta-like protein 4
										106611070	delta-like protein 4
										106599208	protein jagged-2-like
Spleen	Down	Biological process	GO:0051336	regulation of hydrolase activity	3/48	58/9353	0.00321161	0.0467521	0.0413036	106561770	ras-GEF domain-containing family member 1B-B-like
										106607670	T-cell lymphoma invasion and metastasis 2
										106568392	ras-GEF domain-containing family member 1B-B-like
Spleen	Down	Biological process	GO:0007623	circadian rhythm	2/48	17/9353	0.00333944	0.0467521	0.0413036	106608090	CLOCK-interacting pacemaker-like
										106588186	uncharacterized LOC106588186
Spleen	Down	CC	GO:0031012	extracellular matrix	4/52	75/11170	0.000397689	0.0135214	0.00879102	106580931	A disintegrin and metalloproteinase with thrombospondin motifs 8-like
										106579677	collagen alpha-1(XVIII) chain-like
										106612541	A disintegrin and metalloproteinase with thrombospondin motifs 8-like
										106568023	matrix metalloproteinase-28-like
Spleen	Down	CC	GO:0062023	collagen-containing extracellular matrix	3/52	49/11170	0.0015075	0.0256275	0.0166618	106580931	A disintegrin and metalloproteinase with thrombospondin motifs 8-like
										106579677	collagen alpha-1(XVIII) chain-like
										106612541	A disintegrin and metalloproteinase with thrombospondin motifs 8-like
Spleen	Down	CC	GO:0016459	myosin complex	3/52	63/11170	0.00310387	0.0273359	0.0177726	106564323	unconventional myosin-Ih-like
										106562209	unconventional myosin-Ie-like
										106587337	myosin IE
Spleen	Down	CC	GO:0005942	phosphatidylinositol 3-kinase complex	2/52	19/11170	0.00345532	0.0273359	0.0177726	106563018	phosphatidylinositol 3-kinase regulatory subunit alpha-like
										106564678	phosphoinositide 3-kinase regulatory subunit 5-like
Spleen	Down	CC	GO:0005911	cell-cell junction	3/52	70/11170	0.00418192	0.0273359	0.0177726	106607775	gap junction alpha-1 protein-like
										106581058	claudin-3-like
										106612825	claudin-3-like
Spleen	Down	CC	GO:0005923	bicellular tight junction	2/52	25/11170	0.00595485	0.0273359	0.0177726	106581058	claudin-3-like
										106612825	claudin-3-like
Spleen	Down	CC	GO:0043296	apical junction complex	2/52	25/11170	0.00595485	0.0273359	0.0177726	106581058	claudin-3-like
										106612825	claudin-3-like
Spleen	Down	CC	GO:0070160	tight junction	2/52	26/11170	0.00643197	0.0273359	0.0177726	106581058	claudin-3-like
										106612825	claudin-3-like
Spleen	Down	Molecular function	GO:0000981	DNA-binding transcription factor activity, RNA polymerase II-specific	7/76	76/15569	8.32e-08	5.97e-06	4.37e-06	106583303	nuclear receptor subfamily 1 group D member 1-like
										106607496	nuclear receptor subfamily 1 group D member 1-like
										106600825	nuclear receptor subfamily 1 group D member 1-like
										106579008	transcription factor Sox-9-B-like
										106582110	nuclear receptor subfamily 1 group D member 2-like
										100136378	nuclear receptor subfamily 1 group D member 2
										106565463	nuclear receptor subfamily 1 group D member 1-like
Spleen	Down	Molecular function	GO:0004879	nuclear receptor activity	6/76	52/15569	1.89e-07	5.97e-06	4.37e-06	106583303	nuclear receptor subfamily 1 group D member 1-like
										106607496	nuclear receptor subfamily 1 group D member 1-like
										106600825	nuclear receptor subfamily 1 group D member 1-like
										106582110	nuclear receptor subfamily 1 group D member 2-like
										100136378	nuclear receptor subfamily 1 group D member 2
										106565463	nuclear receptor subfamily 1 group D member 1-like
Spleen	Down	Molecular function	GO:0098531	transcription factor activity, direct ligand regulated sequence-specific DNA binding	6/76	52/15569	1.89e-07	5.97e-06	4.37e-06	106583303	nuclear receptor subfamily 1 group D member 1-like
										106607496	nuclear receptor subfamily 1 group D member 1-like
										106600825	nuclear receptor subfamily 1 group D member 1-like
										106582110	nuclear receptor subfamily 1 group D member 2-like
										100136378	nuclear receptor subfamily 1 group D member 2
										106565463	nuclear receptor subfamily 1 group D member 1-like
Spleen	Down	Molecular function	GO:0003707	steroid hormone receptor activity	6/76	85/15569	3.57e-06	8.47e-05	6.2e-05	106583303	nuclear receptor subfamily 1 group D member 1-like
										106607496	nuclear receptor subfamily 1 group D member 1-like
										106600825	nuclear receptor subfamily 1 group D member 1-like
										106582110	nuclear receptor subfamily 1 group D member 2-like
										100136378	nuclear receptor subfamily 1 group D member 2
										106565463	nuclear receptor subfamily 1 group D member 1-like
Spleen	Down	Molecular function	GO:0043565	sequence-specific DNA binding	9/76	373/15569	8.17e-05	0.00155147	0.00113459	106583303	nuclear receptor subfamily 1 group D member 1-like
										106607496	nuclear receptor subfamily 1 group D member 1-like
										106600825	nuclear receptor subfamily 1 group D member 1-like
										106582110	nuclear receptor subfamily 1 group D member 2-like
										100195060	v-ets erythroblastosis virus E26 oncogene homolog 2 (avian)
										106588186	uncharacterized LOC106588186
										106577111	forkhead box protein G1-like
										100136378	nuclear receptor subfamily 1 group D member 2
										106565463	nuclear receptor subfamily 1 group D member 1-like
Spleen	Down	Molecular function	GO:0019207	kinase regulator activity	4/76	67/15569	0.00031838	0.00398305	0.00291281	106575072	cyclin-dependent kinase inhibitor 1B-like
										106609100	cyclin-dependent kinase inhibitor 1B-like
										106563018	phosphatidylinositol 3-kinase regulatory subunit alpha-like
										106564678	phosphoinositide 3-kinase regulatory subunit 5-like
Spleen	Down	Molecular function	GO:0001637	G protein-coupled chemoattractant receptor activity	3/76	28/15569	0.000335414	0.00398305	0.00291281	106581841	C-X-C chemokine receptor type 4-like
										100306754	C-X-C chemokine receptor type 4
										100195489	C-C chemokine receptor type 9
Spleen	Down	Molecular function	GO:0004950	chemokine receptor activity	3/76	28/15569	0.000335414	0.00398305	0.00291281	106581841	C-X-C chemokine receptor type 4-like
										100306754	C-X-C chemokine receptor type 4
										100195489	C-C chemokine receptor type 9
Spleen	Down	Molecular function	GO:0004930	G protein-coupled receptor activity	7/76	298/15569	0.000620309	0.00654771	0.00478835	106581841	C-X-C chemokine receptor type 4-like
										100306754	C-X-C chemokine receptor type 4
										106573949	sphingosine 1-phosphate receptor 1-like
										100195489	C-C chemokine receptor type 9
										106606823	CD97 antigen-like
										106579928	apelin receptor A-like
										106589894	G-protein coupled receptor family C group 5 member C-like
Spleen	Down	Molecular function	GO:0004861	cyclin-dependent protein serine/threonine kinase inhibitor activity	2/76	10/15569	0.00103176	0.00980173	0.00716803	106575072	cyclin-dependent kinase inhibitor 1B-like
										106609100	cyclin-dependent kinase inhibitor 1B-like
Spleen	Down	Molecular function	GO:0004896	cytokine receptor activity	3/76	51/15569	0.00196728	0.0156784	0.0114657	106581841	C-X-C chemokine receptor type 4-like
										100306754	C-X-C chemokine receptor type 4
										100195489	C-C chemokine receptor type 9
Spleen	Down	Molecular function	GO:0004222	metalloendopeptidase activity	4/76	109/15569	0.00198043	0.0156784	0.0114657	106580931	A disintegrin and metalloproteinase with thrombospondin motifs 8-like
										106612541	A disintegrin and metalloproteinase with thrombospondin motifs 8-like
										106568023	matrix metalloproteinase-28-like
										106585164	A disintegrin and metalloproteinase with thrombospondin motifs 12-like
Spleen	Down	Molecular function	GO:0001653	peptide receptor activity	3/76	60/15569	0.00313275	0.0190537	0.013934	106581841	C-X-C chemokine receptor type 4-like
										100306754	C-X-C chemokine receptor type 4
										100195489	C-C chemokine receptor type 9
Spleen	Down	Molecular function	GO:0008528	G protein-coupled peptide receptor activity	3/76	60/15569	0.00313275	0.0190537	0.013934	106581841	C-X-C chemokine receptor type 4-like
										100306754	C-X-C chemokine receptor type 4
										100195489	C-C chemokine receptor type 9
Spleen	Down	Molecular function	GO:0017017	MAP kinase tyrosine/serine/threonine phosphatase activity	2/76	18/15569	0.00342038	0.0190537	0.013934	106611914	dual specificity protein phosphatase 1-like
										100306828	Dual specificity protein phosphatase 6
Spleen	Down	Molecular function	GO:0033549	MAP kinase phosphatase activity	2/76	18/15569	0.00342038	0.0190537	0.013934	106611914	dual specificity protein phosphatase 1-like
										100306828	Dual specificity protein phosphatase 6
Spleen	Down	Molecular function	GO:0035014	phosphatidylinositol 3-kinase regulator activity	2/76	18/15569	0.00342038	0.0190537	0.013934	106563018	phosphatidylinositol 3-kinase regulatory subunit alpha-like
										106564678	phosphoinositide 3-kinase regulatory subunit 5-like
Spleen	Down	Molecular function	GO:0016538	cyclin-dependent protein serine/threonine kinase regulator activity	2/76	19/15569	0.00381073	0.0190537	0.013934	106575072	cyclin-dependent kinase inhibitor 1B-like
										106609100	cyclin-dependent kinase inhibitor 1B-like
Spleen	Down	Molecular function	GO:0030291	protein serine/threonine kinase inhibitor activity	2/76	19/15569	0.00381073	0.0190537	0.013934	106575072	cyclin-dependent kinase inhibitor 1B-like
										106609100	cyclin-dependent kinase inhibitor 1B-like
Spleen	Down	Molecular function	GO:0004860	protein kinase inhibitor activity	2/76	21/15569	0.00465042	0.0210376	0.0153848	106575072	cyclin-dependent kinase inhibitor 1B-like
										106609100	cyclin-dependent kinase inhibitor 1B-like
Spleen	Down	Molecular function	GO:0019210	kinase inhibitor activity	2/76	21/15569	0.00465042	0.0210376	0.0153848	106575072	cyclin-dependent kinase inhibitor 1B-like
										106609100	cyclin-dependent kinase inhibitor 1B-like
Spleen	Down	Molecular function	GO:0008237	metallopeptidase activity	4/76	177/15569	0.0109779	0.0474045	0.034667	106580931	A disintegrin and metalloproteinase with thrombospondin motifs 8-like
										106612541	A disintegrin and metalloproteinase with thrombospondin motifs 8-like
										106568023	matrix metalloproteinase-28-like
										106585164	A disintegrin and metalloproteinase with thrombospondin motifs 12-like
