# Supplementary material for: Host-Parasite Interaction of Atlantic salmon (Salmo salar) and the Ectoparasite Neoparamoeba perurans in Amoebic Gill Disease
Source: Front Immunol. 2021 May 31;12:672700. doi: 10.3389/fimmu.2021.672700 (PMC8202022; doi:10.3389/fimmu.2021.672700)
Supplement: Supplementary Table 10 — Differential expression of genes and transcription factors (TFs) (fold change > 2; P < 0.05) in the zinc finger OZF-like gene network. [Excel table]. [file Table_10.xlsx]

## Sheet: Sheet1
Supplementary Table 10. Differential expression of genes and transcription factors (TFs) (fold change > 2; P < 0.05) in the zinc finger OZF-like gene network.
GeneID	Differential expression	Transcription factor	Tissue	Mean	Description
106614009	0	1	gill	1.50835	cell death specification protein 2-like
106613996	1	0	gill	2.74201	sphingosine 1-phosphate receptor 4-like
106613907	1	0	gill	2.41086	sterol O-acyltransferase 1 isoform X3
106613743	1	0	gill	5.3888	midnolin-like
106613541	1	0	gill	2.4592	choline transporter-like protein 5-B isoform X1
106613385	1	0	gill	2.82686	N-acetyllactosaminide beta-1,3-N-acetylglucosaminyltransferase 2-like
106613230	1	0	gill	3.23706	cysteine and histidine-rich domain-containing protein 1-like
106613220	0	1	gill	1.61824	PCTP-like protein
106613144	1	0	gill	1.29995	uncharacterized protein LOC106613144 isoform X1
106613097	1	0	gill	2.0675	unconventional myosin-XVIIIa-like isoform X13
106613003	1	0	gill	2.19952	uncharacterized protein LOC106613003
106612834	0	1	gill	3.94678	max-binding protein MNT-like isoform X2
106612824	1	0	gill	4.29737	claudin-4-like
106612297	1	0	gill	2.99558	glutathione peroxidase 3-like
106612196	1	0	gill	3.41312	proteoglycan 4-like
106611944	1	0	gill	4.48122	serine protease 27-like
106611928	1	0	gill	1.38018	alpha-1A adrenergic receptor-like
106611915	1	0	gill	3.82525	trypsin inhibitor ClTI-1-like
106611697	1	0	gill	4.75715	mitochondrial import receptor subunit TOM5 homolog
106611445	1	0	gill	4.70779	deoxyribonuclease gamma-like isoform X3
106611397	1	0	gill	1.77713	uncharacterized protein LOC106611397
106611372	0	1	gill	2.1469	uncharacterized protein LOC106611372
106611346	1	0	gill	1.7559	adhesion G-protein coupled receptor F1-like isoform X1
106611045	0	1	gill	1.74268	jun dimerization protein 2-like
106611028	1	0	gill	2.42272	endothelial PAS domain-containing protein 1-like isoform X1
106610846	1	0	gill	1.93884	cysteine-rich motor neuron 1 protein-like isoform X2
106610705	1	0	gill	3.19314	ATPase inhibitor B, mitochondrial-like
106610621	0	1	gill	1.58926	protein odd-skipped-related 1-like
106610593	1	0	gill	1.68275	synaptotagmin-like protein 2 isoform X2
106610135	0	1	gill	1.63194	zinc finger protein with KRAB and SCAN domains 3-like
106610025	1	0	gill	1.3427	secreted frizzled-related protein 2-like
106609638	1	0	gill	1.54063	troponin I, slow skeletal muscle-like isoform X1
106609235	1	0	gill	1.27604	suppressor APC domain-containing protein 1-like
106609115	1	0	gill	1.60122	kinesin-like protein KIF21A isoform X6
106608957	1	0	gill	2.66821	serine protease HTRA3 isoform X3
106608923	1	0	gill	1.67953	collagen alpha-6(IV) chain-like isoform X2
106608749	0	1	gill	3.04236	oocyte zinc finger protein XlCOF6-like isoform X1
106608716	1	0	gill	1.22975	latrophilin-3-like
106608686	0	1	gill	3.86271	dr1-associated corepressor-like
106608626	1	0	gill	5.32804	nuclear factor 1 B-type-like isoform X6
106608496	1	0	gill	2.02974	mucin-2-like isoform X2
106608466	0	1	gill	1.20486	zinc finger protein OZF-like
106608020	1	0	gill	1.7403	cytochrome P450 2K1-like isoform X1
106607757	1	0	gill	1.58582	trans-2-enoyl-CoA reductase, mitochondrial-like
106607727	1	0	gill	3.4203	collagen alpha-1(X) chain-like
106607670	1	0	gill	2.595	T-lymphoma invasion and metastasis-inducing protein 2
106607429	0	1	gill	2.30886	zinc finger protein 24-like
106607311	1	0	gill	4.36553	cytolysin RTX-A-like
106607120	0	1	gill	4.91609	sterol regulatory element-binding protein 2-like
106607032	1	0	gill	4.44836	40S ribosomal protein SA-like
106607014	1	0	gill	1.77106	envoplakin-like
106607010	0	1	gill	3.92669	transcription activator BRG1-like
106606889	1	0	gill	2.64251	cytochrome c oxidase subunit 6A, mitochondrial
106606801	1	0	gill	1.51932	CMRF35-like molecule 8
106606009	1	0	gill	6.74234	protein S100-A1-like
106605867	1	0	gill	4.75041	uncharacterized protein LOC106605867
106605695	1	0	gill	1.35126	meprin A subunit beta-like isoform X1
106605616	1	0	gill	2.07778	zinc finger and BTB domain-containing protein 32-like isoform X1
106605376	1	0	gill	2.75528	G1/S-specific cyclin-E2 isoform X1
106605215	1	0	gill	3.13446	tetraspanin-13-like
106605102	1	0	gill	3.93566	sodium/potassium-transporting ATPase subunit alpha-3-like isoform X2
106605019	1	0	gill	3.06202	cysteine sulfinic acid decarboxylase-like
106604862	0	1	gill	2.54634	zinc finger protein 500-like isoform X2
106604731	1	0	gill	2.78148	glycerophosphoinositol inositolphosphodiesterase GDPD2-like isoform X1
106604450	1	0	gill	2.26744	tenomodulin-like
106604432	1	0	gill	2.02896	uncharacterized
106604326	1	0	gill	6.65995	uncharacterized
106604251	0	1	gill	1.76631	gastrula zinc finger protein XlCGF57.1-like
106604193	1	0	gill	5.44455	ras GTPase-activating protein-binding protein 1-like
106603781	1	0	gill	1.97393	transmembrane protein 132E isoform X1
106603209	1	0	gill	3.48634	claudin-7-B-like
106603177	1	0	gill	1.80022	thiosulfate sulfurtransferase/rhodanese-like domain-containing protein 1
106603058	1	0	gill	4.72805	cystatin-B-like
106602987	1	0	gill	2.08253	neurexin-2-like isoform X9
106602962	1	0	gill	4.13626	four and a half LIM domains protein 1
106602914	1	0	gill	3.3989	uncharacterized protein LOC106602914 isoform X2
106602906	1	0	gill	5.60906	fos-related antigen 2-like isoform X2
106602677	1	0	gill	2.24001	uncharacterized protein LOC106602677 isoform X1
106602465	0	1	gill	1.87531	zinc finger and SCAN domain-containing protein 5B-like
106602386	0	1	gill	1.10502	heart- and neural crest derivatives-expressed protein 2-like
106602299	0	1	gill	3.01114	group XIIA secretory phospholipase A2-like
106602285	1	0	gill	1.3717	hydroperoxide isomerase ALOXE3-like
106602268	1	0	gill	3.50807	hydroperoxide isomerase ALOXE3-like
106602188	0	1	gill	3.05585	zinc finger and SCAN domain-containing protein 12-like isoform X2
106601476	0	1	gill	1.51033	zinc finger protein OZF-like isoform X2
106601355	1	0	gill	3.59093	filaggrin-like
106601300	1	0	gill	1.88234	cysteine-rich motor neuron 1 protein isoform X1
106601259	0	1	gill	1.92539	zinc finger BED domain-containing protein 6-like isoform X2
106601042	1	0	gill	3.46376	cytolysin RTX-A-like
106601033	1	0	gill	3.09534	complement C1q-like protein 2
106600852	1	0	gill	7.92756	collagen alpha-1(I) chain-like
106600816	1	0	gill	4.96842	keratin, type I cytoskeletal 13-like
106600811	0	1	gill	3.54291	gastrula zinc finger protein XlCGF57.1-like
106600735	0	1	gill	3.0667	uncharacterized protein LOC106600735
106600604	1	0	gill	1.01163	zinc finger E-box-binding homeobox 1-like, partial
106600481	0	1	gill	1.36122	zinc finger protein 180-like, partial
106600398	0	1	gill	2.33753	zinc finger protein 34-like
106600396	0	1	gill	1.79978	zinc finger and SCAN domain-containing protein 2-like isoform X2
106600124	1	0	gill	1.5033	ephrin type-A receptor 3-like isoform X1
106599909	0	1	gill	2.59048	interferon regulatory factor 4-like
106599802	1	0	gill	6.23176	CCAAT/enhancer-binding protein delta
106599742	0	1	gill	2.26112	forkhead box C1-A
106599708	1	0	gill	4.12128	desmocollin-2-like isoform X1
106599664	1	0	gill	3.38123	laminin subunit alpha-3-like isoform X1
106599349	1	0	gill	2.79775	cadherin-6-like
106599115	1	0	gill	1.56473	olfactomedin-like protein 2B isoform X2
106599111	0	1	gill	4.67888	cyclic AMP-dependent transcription factor ATF-6 alpha-like isoform X3
106597103	0	1	gill	2.26288	zinc finger protein 2-like
106595126	0	1	gill	1.38151	uncharacterized
106594343	0	1	gill	1.33748	zinc finger protein with KRAB and SCAN domains 7-like isoform X2
106594097	0	1	gill	2.40768	zinc finger protein 14-like isoform X2
106591653	1	0	gill	1.8002	uncharacterized protein LOC106591653 isoform X1
106591110	0	1	gill	7.96264	cyclic AMP-dependent transcription factor ATF-4-like
106590650	1	0	gill	4.90615	immediate early response gene 2 protein-like
106590554	1	0	gill	3.12116	uncharacterized protein LOC106590554
106590517	1	0	gill	2.23265	uncharacterized serine-rich protein C215.13-like isoform X2
106590507	1	0	gill	1.44186	V-set domain-containing T-cell activation inhibitor 1-like
106590328	1	0	gill	1.77809	transcription factor AP-2-alpha isoform X2
106590283	1	0	gill	4.57535	reversion-inducing cysteine-rich protein with Kazal motifs-like
106590121	1	0	gill	1.34666	uncharacterized protein LOC106590121
106590112	0	1	gill	3.4596	homeobox protein TGIF1-like
106590027	1	0	gill	3.15081	neuropilin-1a-like isoform X2
106589894	1	0	gill	2.73738	G-protein coupled receptor family C group 5 member C-like isoform X1
106589641	1	0	gill	2.87464	serine/threonine-protein kinase WNK4 isoform X2
106589574	0	1	gill	1.37805	forkhead box protein L1-like
106589539	0	1	gill	1.56763	nuclear factor interleukin-3-regulated protein-like
106589493	1	0	gill	2.08557	myosin-16-like isoform X1
106588784	1	0	gill	1.99611	SNF-related serine/threonine-protein kinase
106588512	1	0	gill	1.78589	choline transporter-like protein 4 isoform X1
106588456	1	0	gill	1.34002	C3a anaphylatoxin chemotactic receptor-like
106588377	1	0	gill	4.1231	H-2 class I histocompatibility antigen, Q10 alpha chain-like isoform X2
106588175	1	0	gill	4.94152	protein S100-A1-like
106587994	1	0	gill	1.56294	uncharacterized protein LOC106587994
106587805	1	0	gill	2.09725	fibrillin-1-like, partial
106587804	1	0	gill	3.3374	keratin, type I cytoskeletal 13-like
106587783	1	0	gill	3.31778	keratin, type I cytoskeletal 13-like
106587729	1	0	gill	1.27573	membrane progestin receptor gamma-B-like, partial
106587649	0	1	gill	1.59223	gastrula zinc finger protein XlCGF57.1-like
106587529	1	0	gill	2.39453	transcription factor SOX-6
106587514	1	0	gill	1.19525	synaptotagmin-7-like isoform X2
106587367	1	0	gill	5.18352	uncharacterized protein LOC106587367 isoform X1
106587345	1	0	gill	3.13435	retinal dehydrogenase 2-like
106587065	1	0	gill	1.03263	glycosyltransferase-like protein LARGE2
106587046	1	0	gill	1.996	rho guanine nucleotide exchange factor 28-like isoform X3
106586810	1	0	gill	1.11643	gremlin-1-like
106586784	1	0	gill	2.40775	coiled-coil domain-containing protein 80-like
106586667	1	0	gill	2.12936	uncharacterized
106586600	1	0	gill	2.566	3 beta-hydroxysteroid dehydrogenase/Delta 5-->4-isomerase-like
106586477	1	0	gill	2.35792	mitogen-activated protein kinase kinase kinase kinase 4-like isoform X4
106586270	0	1	gill	3.41776	transcription factor Sox-21-B
106586211	1	0	gill	3.96243	D-3-phosphoglycerate dehydrogenase-like
106586043	0	1	gill	2.28627	LIM domain only protein 7-like
106585995	1	0	gill	4.55107	uncharacterized
106585907	0	1	gill	2.1164	zinc finger protein 771-like
106585805	1	0	gill	2.39851	drebrin-like protein B
106585394	1	0	gill	5.53137	glycine dehydrogenase (decarboxylating), mitochondrial-like
106585059	1	0	gill	1.31368	clathrin heavy chain 1-like isoform X2
106585047	1	0	gill	3.17944	platelet glycoprotein Ib beta chain-like
106584939	1	0	gill	1.42323	adipocyte enhancer-binding protein 1-like
106584787	1	0	gill	1.06577	protein phosphatase 1 regulatory subunit 12A-like isoform X2
106584756	1	0	gill	4.22084	zymogen granule membrane protein 16-like
106584433	0	1	gill	4.03318	zinc finger and BTB domain-containing protein 7A-like
106584411	0	1	gill	3.19658	mesoderm induction early response protein 2-like isoform X1
106584377	1	0	gill	1.33505	forkhead box protein D2-like
106583947	1	0	gill	3.07073	inactive serine protease 35-like
106583903	1	0	gill	1.95453	uncharacterized protein LOC106583903 isoform X1
106583751	1	0	gill	5.64595	mesencephalic astrocyte-derived neurotrophic factor-like
106583745	1	0	gill	1.06553	semaphorin-3D-like
106583695	0	1	gill	2.31512	ceramide synthase 5-like
106583693	1	0	gill	3.47801	uncharacterized
106583687	1	0	gill	1.74685	protein APCDD1-like
106583600	0	1	gill	2.71838	homeobox protein AKR-like isoform X2
106583593	0	1	gill	1.01141	homeobox protein XHOX-7.1-like
106583350	0	1	gill	1.23936	zinc finger and SCAN domain-containing protein 2-like
106583349	1	0	gill	3.91164	protein canopy homolog 2-like
106583220	1	0	gill	1.96785	receptor tyrosine-protein kinase erbB-3-like isoform X2
106583208	0	1	gill	3.90074	GATA-binding factor 2-like isoform X1
106583163	1	0	gill	1.69588	uncharacterized protein LOC106583163
106583072	1	0	gill	2.11678	epidermal growth factor receptor kinase substrate 8-like protein 3 isoform X1
106582936	1	0	gill	1.22724	inter-alpha-trypsin inhibitor heavy chain H3-like isoform X2
106582904	0	1	gill	5.35682	DNA-binding protein inhibitor ID-1-like
106582893	1	0	gill	1.5868	ubiquitin carboxyl-terminal hydrolase CYLD-like isoform X1
106582885	1	0	gill	1.52368	protein FAM110C-like
106582442	1	0	gill	1.61388	transcription factor Sox-21-B-like
106582360	1	0	gill	3.02008	zinc finger protein GLI2-like
106582130	1	0	gill	2.20468	insulin receptor substrate 2-like
106581795	1	0	gill	2.08217	polypeptide N-acetylgalactosaminyltransferase 3
106581777	0	1	gill	2.34051	D-3-phosphoglycerate dehydrogenase-like
106581733	1	0	gill	4.75699	uncharacterized protein LOC106581733
106581715	1	0	gill	2.74217	uncharacterized protein LOC106581715 isoform X1
106581616	1	0	gill	1.4981	cis-aconitate decarboxylase
106580875	1	0	gill	2.60837	ras GTPase-activating protein 2
106580734	1	0	gill	1.91329	latent-transforming growth factor beta-binding protein 4 isoform X1
106580469	1	0	gill	1.18758	armadillo repeat protein deleted in velo-cardio-facial syndrome homolog isoform X1
106580330	1	0	gill	1.45096	atrial natriuretic peptide receptor 1-like
106580222	0	1	gill	1.20416	uncharacterized
106580073	0	1	gill	6.5887	osteoclast-stimulating factor 1
106580063	1	0	gill	1.17047	thrombospondin-3 isoform X2
106579874	1	0	gill	2.9324	coxsackievirus and adenovirus receptor homolog
106579855	1	1	gill	3.05698	early growth response protein 3-like isoform X1
106579759	1	0	gill	3.08965	glycogenin-1-like
106579596	1	0	gill	4.78162	cytochrome c oxidase subunit 4 isoform 1, mitochondrial-like
106579552	1	0	gill	2.54267	5-oxoprolinase
106579067	1	0	gill	2.32878	sulfotransferase 1C2-like
106579017	0	1	gill	1.21567	ras-related protein Rab-26-like
106578829	1	0	gill	1.46789	proline-rich protein 18-like
106578801	1	0	gill	3.75304	calpain-2 catalytic subunit-like
106578645	1	0	gill	2.49954	uncharacterized protein LOC106578645 isoform X2
106578532	1	0	gill	4.03244	isopentenyl-diphosphate Delta-isomerase 1 isoform X3
106578489	1	0	gill	3.89343	tissue factor-like isoform X3
106578372	1	0	gill	4.41957	neutral cholesterol ester hydrolase 1 isoform X3
106578239	0	1	gill	2.30729	TSC22 domain family protein 4-like
106578124	0	1	gill	1.59731	zinc finger protein 70-like
106578115	0	1	gill	1.40322	zinc finger protein 2-like
106577847	1	0	gill	3.62973	cytosolic phospholipase A2 gamma-like isoform X1
106577634	1	0	gill	2.80214	uncharacterized protein LOC106577634
106577605	0	1	gill	4.13607	zinc finger MYM-type protein 1-like
106577602	0	1	gill	1.88732	zinc finger protein 135-like
106577509	0	1	gill	2.63847	zinc finger protein 697-like
106577126	1	0	gill	1.95908	GDNF family receptor alpha-1-like isoform X2
106577061	1	0	gill	3.12406	alpha-actinin-2 isoform X1
106577060	1	0	gill	4.89715	prolyl 4-hydroxylase subunit alpha-1-like
106577044	0	1	gill	1.55778	homeobox protein HMX3-like
106577042	1	0	gill	1.74419	carbohydrate sulfotransferase 15-like isoform X1
106576843	1	0	gill	2.10692	canalicular multispecific organic anion transporter 1
106576762	1	0	gill	4.51176	epithelial cell adhesion molecule isoform X3
106576746	1	0	gill	1.82933	extracellular tyrosine-protein kinase PKDCC-like
106576710	1	1	gill	3.30563	uncharacterized protein LOC106576710
106576588	0	1	gill	2.77074	oocyte zinc finger protein XlCOF6-like
106576520	0	1	gill	1.55589	gastrula zinc finger protein XlCGF57.1-like isoform X1
106576211	0	1	gill	3.81569	transcription factor GATA-3-like isoform X5
106576194	0	1	gill	4.29994	scm-like with four MBT domains protein 2
106576185	1	0	gill	1.36437	hemagglutinin/amebocyte aggregation factor-like isoform X1
106575638	1	0	gill	1.56731	T-cell immunoreceptor with Ig and ITIM domains isoform X2
106575554	1	0	gill	4.21934	calcium-binding protein 39-like
106575484	1	0	gill	1.64294	uncharacterized
106575393	0	1	gill	2.32067	gastrula zinc finger protein XlCGF7.1-like
106575362	1	0	gill	3.98362	pituitary tumor-transforming gene 1 protein-interacting protein-like
106575281	1	0	gill	2.34698	E3 ubiquitin-protein ligase Midline-1-like
106575255	0	1	gill	2.09	zinc finger protein 32-like isoform X2
106575194	1	0	gill	3.48235	phospholipase A2 inhibitor 31 kDa subunit-like
106575116	1	0	gill	1.89221	A disintegrin and metalloproteinase with thrombospondin motifs 5
106575082	1	0	gill	5.10357	carbonyl reductase
106574872	0	1	gill	2.78873	zinc finger protein 345-like
106574753	1	0	gill	3.39383	cystathionine beta-synthase-like
106574517	0	1	gill	2.46946	zinc finger protein 2 homolog
106574440	0	1	gill	2.49405	oocyte zinc finger protein XlCOF8.4-like
106574401	0	1	gill	4.73145	26S proteasome non-ATPase regulatory subunit 14
106574152	1	0	gill	1.7477	thromboxane A2 receptor-like isoform X2
106573862	1	0	gill	2.36035	cystathionine gamma-lyase-like isoform X1
106573595	1	0	gill	1.52859	yjeF N-terminal domain-containing protein 3-like
106573588	0	1	gill	3.41037	transmembrane protein 161A-like
106573499	1	0	gill	2.172	filamin-A-interacting protein 1-like isoform X1
106573119	1	0	gill	2.78655	caveolin-1-like
106573105	1	0	gill	3.16415	aurora kinase B-like
106572895	1	0	gill	3.34383	carbonic anhydrase 6-like
106572811	1	0	gill	2.87754	G2/M phase-specific E3 ubiquitin-protein ligase-like isoform X2
106572756	1	0	gill	7.15019	keratin, type I cytoskeletal 18
106572749	1	0	gill	3.16637	tensin-2-like isoform X3
106572705	1	0	gill	1.5322	glucose-6-phosphate 1-dehydrogenase-like isoform X3
106572689	1	0	gill	1.2521	zinc finger protein 385A-like
106572671	1	0	gill	2.04892	indian hedgehog protein-like
106572639	1	0	gill	1.31981	ankyrin repeat domain-containing protein SOWAHC-like
106572567	0	1	gill	4.58737	zinc finger and BTB domain-containing protein 48-like isoform X3
106572350	1	0	gill	2.39786	cingulin-like protein 1
106572218	1	0	gill	2.48295	5\'-nucleotidase domain-containing protein 2-like
106572137	0	1	gill	2.81316	kelch-like protein 17 isoform X5
106572133	0	1	gill	3.79847	transcription factor HES-4-B-like isoform X1
106572115	1	0	gill	3.33078	protein FAM110B-like
106572051	1	0	gill	1.02937	protein Shroom3-like isoform X2
106572005	1	0	gill	2.14616	E3 ubiquitin-protein ligase MIB2-like isoform X1
106571918	1	0	gill	3.48776	cadherin-13-like
106571774	1	0	gill	1.17005	fibronectin type III domain-containing protein 1-like
106571711	0	1	gill	2.65516	BTB/POZ domain-containing protein 6-B isoform X2
106571458	1	0	gill	2.03241	probable G-protein coupled receptor 116 isoform X3
106571373	1	0	gill	3.36567	gap junction alpha-1 protein
106571355	1	0	gill	2.40394	rho GTPase-activating protein 18-like isoform X1
106571301	1	0	gill	2.81929	connective tissue growth factor-like
106570967	1	0	gill	1.0676	bone morphogenetic protein 3-like
106570941	1	0	gill	1.9946	KN motif and ankyrin repeat domain-containing protein 1 isoform X3
106570831	1	0	gill	3.03365	beta-1,3-galactosyl-O-glycosyl-glycoprotein beta-1,6-N-acetylglucosaminyltransferase 4-like isoform X1
106570825	1	0	gill	1.62174	uncharacterized
106570725	1	0	gill	2.01271	uncharacterized protein KIAA1522 homolog isoform X1
106570550	1	0	gill	3.27763	collagen alpha-2(VIII) chain-like
106570515	0	1	gill	1.25634	sorting nexin-10A-like
106570474	0	1	gill	1.95645	homeobox protein Dlx5a-like
106570420	1	0	gill	4.27543	dentin sialophosphoprotein-like isoform X1
106570415	1	0	gill	3.12453	protein NDRG1-like isoform X1
106570209	1	0	gill	2.09171	lanosterol 14-alpha demethylase-like
106570054	1	0	gill	2.88991	choline transporter-like protein 4
106569982	1	0	gill	4.11963	carcinoembryonic antigen-related cell adhesion molecule 6-like
106569874	1	0	gill	3.24254	protein S100-A13-like
106569521	1	0	gill	2.30328	semaphorin-4E-like
106569515	1	0	gill	1.48129	GRAM domain-containing protein 3-like
106569487	1	0	gill	2.7229	carbonic anhydrase 4-like isoform X1
106569170	1	0	gill	3.69259	desmocollin-2-like
106568907	1	0	gill	2.08075	olfactomedin-like protein 2B isoform X1
106568750	1	0	gill	1.60133	tripartite motif-containing protein 7-like
106568509	0	1	gill	3.11205	kelch-like protein 8
106568484	1	0	gill	1.47662	inactive carboxypeptidase-like protein X2 isoform X3
106568458	1	1	gill	3.25825	Krueppel-like factor 4
106568217	1	0	gill	2.53976	proteinase-activated receptor 1
106568023	1	0	gill	1.62393	matrix metalloproteinase-28-like
106568012	1	0	gill	1.64874	caspase-3-like
106567902	1	0	gill	1.51608	alpha-2-antiplasmin-like isoform X2
106567647	0	1	gill	1.76935	homeobox protein PKNOX2-like
106567276	0	1	gill	5.88419	PRA1 family protein 3-like
106567149	1	0	gill	4.8424	78 kDa glucose-regulated protein-like
106566972	1	0	gill	8.76991	keratin, type I cytoskeletal 18-like isoform X1
106566864	0	1	gill	6.31305	dolichyl-diphosphooligosaccharide--protein glycosyltransferase 48 kDa subunit
106566562	0	1	gill	1.09201	protein snail homolog Sna-like isoform X2
106566129	1	0	gill	1.20036	zinc finger protein GLI1-like
106565974	1	0	gill	1.94046	glycerate kinase isoform X2
106565874	1	0	gill	1.37995	complement decay-accelerating factor-like isoform X2
106565629	1	0	gill	1.39884	cyclin-dependent kinase 18-like isoform X1
106565574	1	0	gill	7.72436	uncharacterized
106565477	0	1	gill	4.63332	class E basic helix-loop-helix protein 40-like
106565266	1	0	gill	1.41855	serine incorporator 1-like
106565226	1	0	gill	5.69433	keratin, type II cytoskeletal 8-like
106565224	1	0	gill	2.31649	protein-glutamine gamma-glutamyltransferase 2-like
106565119	1	0	gill	2.71277	uncharacterized protein LOC106565119
106564999	1	0	gill	1.4045	uncharacterized
106564985	1	0	gill	1.3116	uncharacterized
106564958	1	0	gill	7.63637	keratin, type I cytoskeletal 13-like
106564751	1	0	gill	5.85873	junction plakoglobin-like
106564737	1	0	gill	1.61785	collagen alpha-1(IX) chain-like
106564595	1	0	gill	2.56037	xylosyltransferase 1-like
106564555	0	1	gill	1.98858	zinc finger protein 883-like
106564529	1	1	gill	2.44789	zinc finger protein 120-like
106564498	1	0	gill	2.26455	AP-1 complex subunit mu-2-like
106564468	0	1	gill	3.47611	transcription factor AP-4-like, partial
106564430	1	0	gill	1.42915	synaptogyrin-1-like isoform X1
106564393	1	0	gill	1.8532	uncharacterized protein LOC106564393 isoform X1
106564323	1	0	gill	3.07615	unconventional myosin-Ih-like isoform X1
106564048	0	1	gill	1.29661	zinc finger protein 239-like
106564035	0	1	gill	1.24573	zinc finger and SCAN domain-containing protein 2-like
106564014	0	1	gill	1.65405	zinc finger protein 568-like
106563787	1	0	gill	2.00251	uncharacterized
106563762	1	0	gill	2.90355	A disintegrin and metalloproteinase with thrombospondin motifs 2-like, partial
106563534	0	1	gill	3.76837	mothers against decapentaplegic homolog 6-like
106563445	0	1	gill	3.05893	zinc finger protein 62 homolog
106563416	1	0	gill	2.5507	suppressor of tumorigenicity 14 protein-like
106562576	1	0	gill	1.76714	ceramide synthase 2-like
106562535	1	0	gill	3.62053	semaphorin-6D-like isoform X2
106562250	1	0	gill	2.90412	ammonium transporter Rh type C-like
106562238	0	1	gill	2.71723	THAP domain-containing protein 11-like
106562220	1	0	gill	1.35241	dyslexia susceptibility 1 candidate gene 1 protein
106562167	1	0	gill	1.76603	protein CBFA2T3-like isoform X5
106562020	1	0	gill	1.21438	proline-rich protein 36-like
106561827	0	1	gill	5.09473	Golgi phosphoprotein 3-like
106561761	1	0	gill	1.75555	probable phospholipid-transporting ATPase IM
106561706	0	1	gill	8.68087	endoplasmin-like
106561590	1	0	gill	2.59192	ras association domain-containing protein 9
106561265	1	0	gill	2.12273	macrophage mannose receptor 1-like, partial
106561202	1	0	gill	1.64748	semaphorin-3D-like
106561000	0	1	gill	5.103	nuclear transcription factor Y subunit beta
106560888	0	1	gill	4.81427	gigaxonin-like
106560694	1	0	gill	4.19539	junctional adhesion molecule A-like
106560387	1	0	gill	4.00586	desmoglein-2-like isoform X3
106560369	0	1	gill	1.19005	forkhead box C1-A-like
106560337	1	0	gill	3.42252	receptor-type tyrosine-protein phosphatase F isoform X9
106560322	0	1	gill	3.57995	gelsolin-like
106560302	1	0	gill	4.32047	regulator of G-protein signaling 21-like
106560296	1	0	gill	6.46364	regulator of G-protein signaling 5-like
106560289	1	0	gill	1.23721	discoidin domain-containing receptor 2-like isoform X1
100846967	1	0	gill	1.4413	Sodium/potassium-transporting ATPase subunit beta-1
100534607	1	0	gill	2.37512	interleukin 4/13A precursor
100380396	1	0	gill	3.45842	ATPase family AAA domain-containing protein 3
100306748	1	0	gill	2.94608	ketohexokinase isoform X6
100217352	1	0	gill	7.32191	14 kDa transmembrane protein
100196719	1	0	gill	4.53774	uridine phosphorylase 1
100196701	1	0	gill	6.27663	transglutaminase 2
100196698	1	0	gill	5.13009	p53 apoptosis effector related to PMP-22
100196613	1	0	gill	7.83701	78 kDa glucose-regulated protein precursor
100196431	1	0	gill	5.61069	Tumor-associated calcium signal transducer 2 precursor
100196316	1	0	gill	5.94691	S100-A16
100196167	1	0	gill	2.23021	Twisted gastrulation protein homolog 1-A precursor
100196116	1	0	gill	2.15037	Epigen precursor
100196037	1	0	gill	2.17838	Homeobox protein koza
100195474	1	0	gill	1.95464	Keratin, type I cytoskeletal 18
100195433	1	0	gill	3.58843	methylosome protein 50 isoform X1
100194908	1	0	gill	2.76338	Ubiquitin-conjugating enzyme E2 R2
100136550	1	0	gill	1.62092	insulin-like growth factor II
100136468	1	0	gill	4.57649	anterior gradient protein 2 homolog isoform X1
100136453	1	0	gill	3.33411	cathelicidin isoform X1
100136356	1	0	gill	1.91391	fork head domain protein
106610847	1	0	H kidney	4.84779	bcl-2-modifying factor-like isoform X1
106610118	0	1	H kidney	3.00839	zinc finger protein with KRAB and SCAN domains 1-like
106610109	0	1	H kidney	2.93047	uncharacterized protein LOC106610109 isoform X2
106609534	1	0	H kidney	5.00473	ribosomal L1 domain-containing protein 1-like isoform X1
106608947	1	0	H kidney	2.93012	plasminogen activator inhibitor 1-like
106608467	0	1	H kidney	4.6534	uncharacterized
106607015	0	1	H kidney	4.42703	nucleosome-remodeling factor subunit BPTF-like
106606997	1	0	H kidney	5.02825	SEC14-like protein 1 isoform X2
106605221	1	0	H kidney	1.94464	RING finger protein 183-like
106602244	1	0	H kidney	3.69016	C-type lectin domain family 4 member M-like
106601402	1	0	H kidney	1.9311	cytoglobin-2-like
106601282	1	0	H kidney	4.23645	suppressor of SWI4 1 homolog
106590243	1	0	H kidney	4.49015	CCAAT/enhancer-binding protein epsilon-like isoform X1
106589388	1	0	H kidney	3.22637	AMSH-like protease isoform X2
106587077	1	0	H kidney	5.56556	phosphoinositide 3-kinase regulatory subunit 5-like
106586257	1	0	H kidney	1.79316	G-protein coupled receptor 1-like
106583239	0	1	H kidney	4.53607	SWI/SNF complex subunit SMARCC2-like isoform X3
106580294	1	0	H kidney	4.29499	pleckstrin homology domain-containing family A member 2-like
106579861	1	0	H kidney	4.21924	mitoferrin-1
106579687	0	1	H kidney	1.99774	uncharacterized protein LOC106579687
106579328	1	0	H kidney	3.18474	ETS translocation variant 4-like isoform X1
106578312	0	1	H kidney	1.38089	homeobox protein Dlx4b-like
106578085	1	0	H kidney	5.0503	chemokine-like receptor 1
106578046	1	0	H kidney	1.21279	intermediate conductance calcium-activated potassium channel protein 4-like isoform X2
106577817	1	0	H kidney	7.31117	thioredoxin-like
106577272	1	0	H kidney	4.832	hepatic lectin-like isoform X2
106577215	1	0	H kidney	4.1266	inorganic pyrophosphatase
106576373	0	1	H kidney	3.66908	zinc finger protein 574-like
106576052	1	1	H kidney	3.36701	transcription factor EC-like isoform X8
106575674	1	0	H kidney	6.44174	cytochrome b-245 heavy chain-like
106574378	1	0	H kidney	3.7755	protein CLN8
106573250	0	1	H kidney	3.62779	nuclear factor of activated T-cells, cytoplasmic 3-like isoform X1
106572552	1	0	H kidney	2.12936	agmatinase, mitochondrial isoform X2
106572112	1	0	H kidney	5.51543	bcl-2-like protein 1
106571891	1	0	H kidney	4.89076	uncharacterized protein LOC106571891 isoform X2
106570998	1	0	H kidney	1.4126	uncharacterized
106570466	0	1	H kidney	3.52412	uncharacterized protein LOC106570466
106570099	1	0	H kidney	2.40044	ictacalcin-like
106570011	1	0	H kidney	4.21711	sialoadhesin-like isoform X2
106569932	1	0	H kidney	4.56215	ATPase family AAA domain-containing protein 2-like isoform X2
106568047	1	0	H kidney	2.72758	uromodulin-like 1
106567077	1	0	H kidney	5.05536	G-protein coupled receptor 182-like
106565443	1	0	H kidney	3.07429	matrix metalloproteinase-19-like
106565332	1	0	H kidney	2.56596	protein FAM3D
106564743	0	1	H kidney	5.01857	transcription factor Sp2-like isoform X2
106564378	1	0	H kidney	1.45077	complement C1q tumor necrosis factor-related protein 1-like
106563786	1	0	H kidney	3.27986	uncharacterized
106562054	1	0	H kidney	1.70789	7-dehydrocholesterol reductase isoform X1
100499254	1	0	H kidney	2.95658	selenoprotein L
100380346	1	0	H kidney	4.53687	Transcriptional regulator Myc-2
100306754	1	0	H kidney	5.91952	C-X-C chemokine receptor type 4
100196700	1	0	H kidney	5.29183	T-cell activation Rho GTPase-activating protein
100196368	1	0	H kidney	4.38931	ribosome biogenesis regulatory protein homolog
100195823	1	0	H kidney	4.18829	Delta-aminolevulinic acid dehydratase
100195489	1	0	H kidney	5.13208	C-C chemokine receptor type 9
106613622	1	0	spleen	7.32899	arrestin domain-containing protein 2-like
106613611	1	0	spleen	3.34276	mitotic interactor and substrate of PLK1-like isoform X3
106613077	1	0	spleen	5.53082	serine/threonine-protein kinase NLK
106612705	1	0	spleen	6.09004	flavin reductase (NADPH)-like
106612672	1	0	spleen	1.4898	bone morphogenetic protein 5-like
106612220	1	0	spleen	1.86668	SH3 domain-containing RING finger protein 3-like isoform X1
106611175	0	1	spleen	6.14723	NF-kappa-B inhibitor alpha-like
106611159	1	0	spleen	1.79809	B2 bradykinin receptor-like
106611131	0	1	spleen	4.34955	forkhead box protein N2-like
106610662	0	1	spleen	5.8654	DNA-binding protein inhibitor ID-3-A-like
106610396	0	1	spleen	4.90036	transcriptional repressor protein YY1-like
106610136	0	1	spleen	1.66151	zinc finger protein 33A-like
106609880	1	0	spleen	7.4662	ATP-binding cassette sub-family A member 1-like isoform X1
106609242	0	1	spleen	3.4895	transcription factor EC-like isoform X3
106608972	0	1	spleen	2.55666	TOX high mobility group box family member 4-B-like isoform X3
106608858	1	0	spleen	3.24198	sushi, von Willebrand factor type A, EGF and pentraxin domain-containing protein 1-like isoform X1
106608612	1	0	spleen	3.71708	synaptopodin-2-like isoform X2
106608532	0	1	spleen	2.9706	transforming protein p54/c-ets-1-like
106607699	1	0	spleen	1.65683	5\'-nucleotidase-like isoform X1
106607677	0	1	spleen	2.93318	paired box protein Pax-1-like
106607112	1	0	spleen	5.40368	hemoglobin subunit beta-1
106606823	1	0	spleen	6.57065	CD97 antigen-like
106606529	0	1	spleen	3.79785	far upstream element-binding protein 2-like isoform X3
106604716	1	0	spleen	3.25778	EGF-containing fibulin-like extracellular matrix protein 2 isoform X1
106604703	0	1	spleen	3.90873	sestrin-3-like isoform X1
106604539	1	0	spleen	2.57852	prominin-1-A-like isoform X10
106603990	1	0	spleen	1.54853	serine/threonine-protein kinase TAO1-like
106602758	1	0	spleen	2.33533	leucine-rich repeat transmembrane neuronal protein 1-like
106602627	1	0	spleen	4.6444	spectrin beta chain, erythrocytic-like isoform X1
106601432	1	0	spleen	3.56059	E3 ubiquitin-protein ligase RNF12-B-like isoform X3
106600951	1	0	spleen	5.42593	ferritin, middle subunit isoform X2
106600836	0	1	spleen	1.37924	homeobox protein Hox-B2a-like
106600435	1	0	spleen	3.78529	aquaporin FA-CHIP-like
106599692	1	0	spleen	2.26143	BTB/POZ domain-containing protein KCTD1 isoform X2
106599438	1	0	spleen	3.20682	25-hydroxycholesterol 7-alpha-hydroxylase-like
106598526	1	0	spleen	6.93035	regulator of G-protein signaling 21-like
106590030	1	0	spleen	6.18009	heme oxygenase-like
106589898	1	0	spleen	1.85821	alpha-N-acetylgalactosaminide alpha-2,6-sialyltransferase 2-like
106588496	1	0	spleen	1.56658	exostosin-1c-like isoform X1
106588371	0	1	spleen	2.30797	chorion transcription factor Cf2-like
106588012	0	1	spleen	2.24735	nuclear receptor ROR-alpha-like
106587619	1	0	spleen	2.19133	talin-2-like
106587438	0	1	spleen	1.18213	uncharacterized
106587409	1	0	spleen	3.98219	lysozyme g-like isoform X2
106587399	0	1	spleen	4.08108	transcription factor E2F5-like isoform X2
106586430	0	1	spleen	1.93967	zinc finger protein GLI2-like
106586304	1	0	spleen	3.93675	ras-related protein M-Ras-like
106586192	1	0	spleen	2.84172	growth factor receptor-bound protein 14-like isoform X2
106586175	1	0	spleen	5.91103	catalase-like
106586171	1	0	spleen	1.18123	activin receptor type-1C-like isoform X1
106585613	0	1	spleen	3.44709	AT-rich interactive domain-containing protein 5A-like isoform X2
106585505	1	0	spleen	5.51329	lysine-specific demethylase 2B-like isoform X5
106585199	1	0	spleen	9.11073	selenoprotein P
106584017	1	0	spleen	4.4794	thrombopoietin receptor-like
106583003	1	0	spleen	3.46617	complement decay-accelerating factor isoform X6
106582703	1	0	spleen	1.78687	SAM pointed domain-containing Ets transcription factor-like isoform X1
106582008	1	0	spleen	3.55157	filamin A-interacting protein 1-like
106580917	1	0	spleen	4.95943	tropomodulin-4-like
106580774	1	0	spleen	4.39683	tubulin-specific chaperone cofactor E-like protein isoform X2
106580767	1	0	spleen	2.84513	cytochrome c oxidase subunit 7A2, mitochondrial-like
106580739	1	0	spleen	6.54368	flavin reductase (NADPH)
106580341	1	0	spleen	5.25508	ankyrin-1-like isoform X1
106580210	0	1	spleen	1.23936	zinc finger protein with KRAB and SCAN domains 3-like isoform X1
106580029	1	0	spleen	2.23665	integrin alpha-8-like isoform X2
106579988	1	1	spleen	2.24777	nuclear receptor subfamily 5 group A member 2-like isoform X2
106579920	1	1	spleen	2.90162	filamin-interacting protein FAM101A-like
106579653	0	1	spleen	4.69705	lethal(3)malignant brain tumor-like protein 4 isoform X2
106578993	1	0	spleen	5.88788	uncharacterized
106578519	1	0	spleen	2.15859	cubilin
106578451	1	0	spleen	2.09759	choline-phosphate cytidylyltransferase B-like isoform X2
106578238	1	0	spleen	1.93299	2-acylglycerol O-acyltransferase 2-A-like
106577870	1	0	spleen	3.8036	basement membrane-specific heparan sulfate proteoglycan core protein-like, partial
106577834	1	0	spleen	2.34152	growth-regulated alpha protein-like
106576798	1	0	spleen	2.6706	kynurenine 3-monooxygenase-like
106576764	1	0	spleen	1.85066	tetratricopeptide repeat protein 7A-like isoform X2
106576390	0	1	spleen	3.3778	oocyte zinc finger protein XlCOF22-like
106575454	1	0	spleen	6.49479	WW domain-binding protein 4-like
106574270	1	0	spleen	1.83098	matrix-remodeling-associated protein 5-like isoform X2
106574039	1	0	spleen	3.33375	T-cell acute lymphocytic leukemia protein 1 homolog
106573812	1	0	spleen	5.88129	Krueppel-like factor 2
106573697	1	0	spleen	1.69711	WAP four-disulfide core domain protein 1
106573466	1	0	spleen	5.66528	protein 4.1-like
106572294	1	0	spleen	4.99361	phosphatidylinositol 3,4,5-trisphosphate-dependent Rac exchanger 1 protein-like
106570619	1	0	spleen	2.37527	calcium-binding mitochondrial carrier protein SCaMC-2-B isoform X2
106570020	1	0	spleen	3.61997	trichohyalin-like, partial
106569971	0	1	spleen	2.03551	transcription factor 19-like
106569391	0	1	spleen	1.49434	zinc finger protein 333-like
106569234	1	0	spleen	1.4618	protein canopy-1-like
106568987	1	0	spleen	2.53519	volume-regulated anion channel subunit LRRC8D-like
106567873	1	0	spleen	3.87422	asialoglycoprotein receptor 1-like
106567537	1	0	spleen	2.32885	coiled-coil domain-containing protein 83 isoform X2
106567515	1	0	spleen	1.51399	PDZ and LIM domain protein 4-like
106566109	0	1	spleen	6.43749	tubulin beta-6 chain-like
106565590	0	1	spleen	4.92385	cyclic AMP-dependent transcription factor ATF-7-like isoform X1
106565346	1	0	spleen	6.82513	peptidyl-prolyl cis-trans isomerase FKBP5-like
106564490	0	1	spleen	2.76131	gastrula zinc finger protein XlCGF57.1-like isoform X2
106564204	1	0	spleen	3.67434	uncharacterized protein LOC106564204 isoform X2
106563403	1	0	spleen	2.99746	dentin sialophosphoprotein-like
106563018	1	0	spleen	6.15899	phosphatidylinositol 3-kinase regulatory subunit alpha-like isoform X1
106562983	1	0	spleen	6.60634	inactive carboxypeptidase-like protein X2 isoform X2
106560515	1	0	spleen	5.56207	thrombopoietin receptor-like isoform X2
101448058	1	0	spleen	1.19942	insulin-like growth factor binding protein 5 paralog B1 precursor
100500787	0	1	spleen	4.80985	myocyte-specific enhancer factor 2C isoform X1
100499263	1	0	spleen	5.30973	selenoprotein Ja
100380852	1	0	spleen	2.44578	ectonucleotide pyrophosphatase/phosphodiesterase family member 1
100306867	1	0	spleen	5.48088	CB055 protein isoform X1
100306838	1	0	spleen	4.0111	beta-adducin isoform X2
100286645	1	0	spleen	4.46794	Response gene to complement 32 protein
100196823	1	0	spleen	3.13185	FAD-dependent oxidoreductase domain-containing protein 1 isoform X1
100196543	1	0	spleen	4.43881	equilibrative nucleoside transporter 1
100195749	1	0	spleen	1.33224	sperm flagellar protein 1 isoform X1
100195685	1	0	spleen	2.13766	serine/threonine-protein kinase SIK2
100195543	1	0	spleen	4.55405	eukaryotic translation initiation factor 2-alpha kinase 1 isoform X1
100195531	1	0	spleen	5.6719	chloride intracellular channel protein 2 isoform X1
100195398	1	0	spleen	3.44396	Fatty aldehyde dehydrogenase
100195209	1	0	spleen	3.93425	alpha-N-acetylgalactosaminide alpha-2,6-sialyltransferase 6 isoform X1
100194509	1	0	spleen	5.59027	tropomodulin-4 isoform X1
